# Supplementary material for: Endocrine Therapy-Based Strategies for Metastatic Breast Cancer with Different Endocrine Sensitivity Statuses: A Systematic Review and Network Meta-Analysis
Source: MDPI journal article supplement (doi:10.3390/cancers14246100), 2022-12-11

# Endocrine Therapy-Based Strategies for Metastatic Breast Cancer with Different Endocrine Sensitivity Statuses : A Systematic Review and Network Meta-Analysis

## **eTable S1. Electronic search strategy**

eTable S2A. PFS effect estimates of ETS patients for pairwise comparisons: hazard ratio (95% credibility interval, CrI) (network 1)

eTable S2B. PFS effect estimates of ETS patients for pairwise comparisons: hazard ratio (95% credibility interval, CrI) (network 2)

eTable S2C. OS effect estimates of ETS patients for pairwise comparisons: hazard ratio (95% credibility interval, CrI)

eTable S3A. PFS effect estimates of ETR patients for pairwise comparisons: hazard ratio (95% credibility interval, CrI) (network 1)

eTable S3B. PFS effect estimates of ETR patients for pairwise comparisons: hazard ratio (95% credibility interval, CrI) (network 2)

eTable S3C. OS effect estimates of ETR patients for pairwise comparisons: hazard ratio (95% credibility interval, CrI) (network 1)

eTable S3D. OS effect estimates of ETR patients for pairwise comparisons: hazard ratio (95% credibility interval, CrI) (network 2)

eTable S4. SUCRA values of PFS for CDK4/6 inhibitors in ETS patients

eTable S5. Effect estimates of PFS for CDK4/6 inhibitors in ETS patients: hazard ratio (95% credibility interval, CrI)

eTable S6. SUCRA values for PI3ki in ETS patients

eTable S7. Effect estimates of PFS for PI3ki in ETS patients hazard ratio (95% credibility interval, CrI)

eTable S8. SUCRA values of PFS for HDACi in ETS patients

eTable S9. Effect estimates of PFS for HDACi in ETS patients hazard ratio (95% credibility interval, CrI)

eTable S10. SUCRA of PFS for visceral metastases in ETS patients

eTable S11. Effect estimates of PFS for visceral metastases in ETS patients: hazard ratio (95% credibility interval, CrI)

eTable S12. SUCRA values of PFS for bone metastases in ETS patients

eTable S13. Effect estimates of PFS for bone metastases in ETS patients: hazard ratio (95% credibility interval, CrI)

eTable S14. SUCRA values of PFS for CDK4/6 inhibitors in ETR patients (Network 1)

eTable S15. Effect estimates of PFS for CDK4/6 inhibitors in ETR patients: hazard ratio (95% credibility interval, CrI) (Network 1)

eTable S16. SUCRA values of PFS for CDK4/6 inhibitors in ETR patients (Network 2)

eTable S17. Effect estimates of PFS for CDK4/6 inhibitors in ETR patients: hazard ratio (95% credibility interval, CrI) (Network 2)

eTable S18. SUCRA values of PFS for PI3ki in ETR patients

eTable S19. Effect estimates of PFS for PI3ki in ETR patients: hazard ratio (95% credibility interval, CrI)

eTable S20. SUCRA values of PFS for HDACi in ETR patients

eTable S21. Effect estimates of PFS for HDACi in ETR patients: hazard ratio (95% credibility interval, CrI)

eTable S22. SUCRA values of PFS for visceral metastases in ETR patients (network 1)

eTable S23. Effect estimates of PFS for visceral metastases in ETR patients: hazard ratio (95% credibility interval, CrI) (network 1)

eTable S24. SUCRA values of PFS for visceral metastases in ETR patients (network 2)

eTable S25. Effect estimates of PFS for visceral metastases in ETR patients: hazard ratio (95% credibility interval, CrI) (network 2)

eTable S26. SUCRA values of PFS for bone metastases in ETR patients (network 1)

eTable S27. Effect estimates of PFS for bone metastases in ETR patients: hazard ratio (95% credibility interval, CrI) (network 1)

eTable S28. SUCRA values of PFS for bone metastases in ETR patients (network 2)

eTable S29. Effect estimates of PFS for bone metastases in ETR patients: hazard ratio (95% credibility interval, CrI) (network 2)

eTable S30. SUCRA values of PFS for post-menopausal women in ETR patients (network 1)

eTable S31. Effect estimates of PFS for post-menopausal women in ETR patients: hazard ratio (95% credibility interval, CrI) (network 1)

eTable S32. SUCRA values of PFS for post-menopausal women in ETR patients (network 2)

eTable S33. Effect estimates of PFS for post-menopausal women in ETR patients: hazard ratio (95% credibility interval, CrI) (network 2)

eTable S34. SUCRA values of PFS for pre-menopausal women in ETR patients (network 1)

eTable S35. Effect estimates of PFS for pre-menopausal women in ETR patients: hazard ratio (95% credibility interval, CrI) (network 1)

eTable S36. SUCRA values of PFS for pre-menopausal women in ETR patients (network 2)

eTable S37. Effect estimates of PFS for pre-menopausal women in ETR patients: hazard ratio (95% credibility interval, CrI) (network 2)

eFigure S1. Risk of bias across studies (main analysis in ETS and ETR patients)

eFigure S2. Risk of bias across studies (subgroup analysis for targeted regimens in ETS patients)

eFigure S3. Risk of bias across studies (subgroup analysis for targeted regimens and menopausal women in ETR patients)

eFigure S4. Quality assessment data for individual studies

eFigure S5. Chemical structure of fulvestrant

**eTable S1. Electronic search strategy**

| #  | Searches                          |
|----|-----------------------------------|
| 1  | trastuzumab/                      |
| 2  | trastuzumab.tw.                   |
| 3  | 1 or 2                            |
| 4  | HER2-positive                     |
| 5  | advanced breast cancer/           |
| 6  | advanced breast cancer.tw.        |
| 7  | metastatic breast cancer/         |
| 8  | metastatic breast cancer.tw.      |
| 9  | locally advanced breast cancer/   |
| 10 | locally advanced breast cancer.tw |

|    |                                |
|----|--------------------------------|
| 11 | 6 or 7 or 8 or 9 or 10 or 11   |
| 12 | disease progression/           |
| 13 | disease progression.tw.        |
| 14 | 12 or 13                       |
| 15 | chemotherapy/                  |
| 16 | chemotherapy.tw.               |
| 17 | 15 or 16                       |
| 18 | 3 and 4 and 12 and 14 and 17   |
| 19 | randomized controlled trials/  |
| 20 | randomized-controlled-trial.pt |
| 21 | controlled-clinical-trial.pt   |
| 22 | random allocation/             |
| 23 | 19 or 20 or 21 or 22           |
| 24 | research design/               |

|    |                         |
|----|-------------------------|
| 25 | comparative study       |
| 26 | exp evaluation studies/ |
| 27 | follow-up studies/      |
| 28 | prospective studies/    |
| 29 | 25 or 26 or 27 or 28    |
| 30 | 23 or 24 or 29          |
| 31 | 28 and 30               |

**eTable S2A. PFS effect estimates of ETS patients for pairwise comparisons: hazard ratio (95% credibility interval, CrI) (network 1)**

**Random effect model**

|                              |                                       |                              |                              |                             |                                |                                         |                             |                              |                              |                            |                             |
|------------------------------|---------------------------------------|------------------------------|------------------------------|-----------------------------|--------------------------------|-----------------------------------------|-----------------------------|------------------------------|------------------------------|----------------------------|-----------------------------|
| <b>AI</b>                    | <b>0.8301<br/>(0.3627,<br/>1.853)</b> | 0.7354<br>(0.3467,<br>1.525) | 0.8123<br>(0.4648,<br>1.5)   | 1.005<br>(0.7383,<br>1.356) | 0.5299<br>(0.3916,<br>0.7081)  | 0.4554<br>(0.2649,<br>0.769)            | 0.839<br>(0.5248,<br>1.325) | 0.6615<br>(0.3112,<br>1.404) | 0.752<br>(0.4274,<br>1.322)  | 2.073<br>(1.35,<br>3.302)  | 1.622<br>(0.6357,<br>4.145) |
| 1.205<br>(0.5397,<br>2.757)  | <b>AI_plus_androg<br/>en</b>          | 0.8882<br>(0.2991,<br>2.575) | 0.9849<br>(0.364,<br>2.728)  | 1.216<br>(0.5102,<br>2.836) | 0.6427<br>(0.2593,<br>1.494)   | 0.5513<br>(0.2088, 1.45)                | 1.014<br>(0.3968,<br>2.586) | 0.7962<br>(0.2635,<br>2.439) | 0.9068<br>(0.3534,<br>2.478) | 2.526<br>(1.033,<br>6.328) | 1.976<br>(0.5757,<br>6.548) |
| 1.36<br>(0.6557,<br>2.885)   | 1.126<br>(0.3883,<br>3.343)           | <b>AI_plus_F<br/>UL250</b>   | 1.102<br>(0.437,<br>2.879)   | 1.374<br>(0.6109,<br>3.067) | 0.7185<br>(0.332,<br>1.604)    | 0.6149<br>(0.2582,<br>1.573)            | 1.139<br>(0.4777,<br>2.841) | 0.8992<br>(0.3035,<br>2.581) | 1.018<br>(0.4245,<br>2.557)  | 2.815<br>(1.217,<br>6.841) | 2.225<br>(0.6943,<br>7.331) |
| 1.231<br>(0.6667,<br>2.151)  | 1.015<br>(0.3666,<br>2.747)           | 0.9076<br>(0.3473,<br>2.288) | <b>AI_plus_<br/>MAB</b>      | 1.229<br>(0.625,<br>2.345)  | 0.6485<br>(0.3297,<br>1.236)   | 0.5581<br>(0.248, 1.202)                | 1.033<br>(0.4674,<br>2.094) | 0.8104<br>(0.3061,<br>2.099) | 0.9288<br>(0.4034,<br>1.988) | 2.554<br>(1.217,<br>5.361) | 2.018<br>(0.6564,<br>5.939) |
| 0.9954<br>(0.7377,<br>1.354) | 0.8224<br>(0.3527,<br>1.96)           | 0.7277<br>(0.3261,<br>1.637) | 0.8135<br>(0.4264,<br>1.6)   | <b>AI_plus_T<br/>KI</b>     | 0.5279<br>(0.3451,<br>0.8095)  | 0.4512<br>(0.2463,<br>0.8375)           | 0.8337<br>(0.476,<br>1.453) | 0.6609<br>(0.2844,<br>1.473) | 0.7511<br>(0.3935,<br>1.412) | 2.064<br>(1.225,<br>3.569) | 1.628<br>(0.6059,<br>4.302) |
| 1.887<br>(1.412,<br>2.554)   | 1.556<br>(0.6695,<br>3.856)           | 1.392<br>(0.6233,<br>3.012)  | 1.542<br>(0.8087,<br>3.033)  | 1.894<br>(1.235,<br>2.898)  | <b>CDK4_or_<br/>6i_plus_AI</b> | 0.8618<br>(0.5073,<br>1.453)            | 1.577<br>(0.947,<br>2.623)  | 1.243<br>(0.5728,<br>2.697)  | 1.423<br>(0.7485,<br>2.661)  | 3.911<br>(2.307,<br>6.917) | 3.07<br>(1.123,<br>8.244)   |
| 2.196 (1.3,<br>3.774)        | 1.814<br>(0.6896,<br>4.79)            | 1.626<br>(0.6359,<br>3.873)  | 1.792<br>(0.832,<br>4.032)   | 2.216<br>(1.194,<br>4.06)   | 1.16<br>(0.6884,<br>1.971)     | <b>CDK4_or_6i<br/>_plus_FUL5<br/>00</b> | 1.845<br>(1.247,<br>2.742)  | 1.439<br>(0.6932,<br>2.963)  | 1.659<br>(0.786,<br>3.562)   | 4.58<br>(2.331,<br>9.604)  | 3.592<br>(1.244,<br>10.54)  |
| 1.192<br>(0.7544,<br>1.905)  | 0.9866<br>(0.3867,<br>2.52)           | 0.8778<br>(0.3519,<br>2.093) | 0.9682<br>(0.4774,<br>2.14)  | 1.199<br>(0.6883,<br>2.101) | 0.6339<br>(0.3812,<br>1.056)   | 0.5421<br>(0.3646,<br>0.8022)           | <b>FUL500</b>               | 0.7874<br>(0.4252,<br>1.442) | 0.8979<br>(0.4364,<br>1.852) | 2.464<br>(1.31,<br>4.928)  | 1.937<br>(0.7013,<br>5.563) |
| 1.512<br>(0.7122,<br>3.213)  | 1.256<br>(0.4101,<br>3.795)           | 1.112<br>(0.3874,<br>3.295)  | 1.234<br>(0.4765,<br>3.267)  | 1.513<br>(0.6789,<br>3.516) | 0.8047<br>(0.3709,<br>1.746)   | 0.6952<br>(0.3375,<br>1.443)            | 1.27<br>(0.6935,<br>2.352)  | <b>Ful500_pl<br/>us_PI3K</b> | 1.141<br>(0.4475,<br>2.937)  | 3.165<br>(1.333,<br>7.749) | 2.494<br>(0.7712,<br>8.42)  |
| 1.33<br>(0.7564,<br>2.34)    | 1.103<br>(0.4036,<br>2.829)           | 0.9823<br>(0.3911,<br>2.356) | 1.077<br>(0.503,<br>2.479)   | 1.331<br>(0.7084,<br>2.541) | 0.7027<br>(0.3758,<br>1.336)   | 0.6028<br>(0.2807,<br>1.272)            | 1.114<br>(0.54,<br>2.291)   | 0.8761<br>(0.3405,<br>2.235) | <b>HDAC_pl<br/>us_AI</b>     | 2.76<br>(1.396,<br>5.578)  | 2.176<br>(0.7165,<br>6.34)  |
| 1.013<br>(0.6281,<br>1.621)  | 0.8311<br>(0.3199,<br>2.163)          | 0.7431<br>(0.3011,<br>1.775) | 0.8183<br>(0.3978,<br>1.773) | 1.018<br>(0.568,<br>1.782)  | 0.5359<br>(0.3015,<br>0.9255)  | 0.4602<br>(0.2191,<br>0.9113)           | 0.8504<br>(0.434,<br>1.627) | 0.671<br>(0.2662,<br>1.6)    | 0.7633<br>(0.3585,<br>1.582) | 2.098<br>(1.127,<br>4.007) | 1.66<br>(0.5618,<br>4.735)  |

|                               |                              |                               |                               |                               |                               |                                |                               |                              |                               |                             |                              |
|-------------------------------|------------------------------|-------------------------------|-------------------------------|-------------------------------|-------------------------------|--------------------------------|-------------------------------|------------------------------|-------------------------------|-----------------------------|------------------------------|
| 0.4823<br>(0.3028,<br>0.7406) | 0.3959<br>(0.158,<br>0.9679) | 0.3552<br>(0.1462,<br>0.8218) | 0.3916<br>(0.1865,<br>0.8214) | 0.4845<br>(0.2802,<br>0.8162) | 0.2557<br>(0.1446,<br>0.4335) | 0.2183<br>(0.1041,<br>0.429)   | 0.4059<br>(0.2029,<br>0.7636) | 0.316<br>(0.1291,<br>0.7501) | 0.3623<br>(0.1793,<br>0.7165) | <b>Tam</b>                  | 0.7869<br>(0.3421,<br>1.731) |
| 0.6166<br>(0.2412,<br>1.573)  | 0.5061<br>(0.1527,<br>1.737) | 0.4494<br>(0.1364,<br>1.44)   | 0.4955<br>(0.1684,<br>1.524)  | 0.6142<br>(0.2325,<br>1.65)   | 0.3257<br>(0.1213,<br>0.8904) | 0.2784<br>(0.09487,<br>0.8041) | 0.5162<br>(0.1798,<br>1.426)  | 0.401<br>(0.1188,<br>1.297)  | 0.4596<br>(0.1577,<br>1.396)  | 1.271<br>(0.5776,<br>2.924) | <b>TKI_plus_Tam</b>          |

### Fixed effect model

|                             |                              |                               |                               |                              |                               |                               |                              |                               |                               |                            |                             |
|-----------------------------|------------------------------|-------------------------------|-------------------------------|------------------------------|-------------------------------|-------------------------------|------------------------------|-------------------------------|-------------------------------|----------------------------|-----------------------------|
| <b>AI</b>                   | 0.8205<br>(0.5407,<br>1.244) | 0.7396<br>(0.5946,<br>0.9213) | 0.7765<br>(0.6142,<br>0.9767) | 0.9816<br>(0.8831,<br>1.095) | 0.5435<br>(0.483,<br>0.614)   | 0.4814<br>(0.398,<br>0.5844)  | 0.8675<br>(0.7366,<br>1.024) | 0.6605<br>(0.4864,<br>0.8965) | 0.7291<br>(0.5661,<br>0.9437) | 1.529<br>(1.348,<br>1.727) | 1.195<br>(0.7901,<br>1.809) |
| 1.219<br>(0.804,<br>1.849)  | <b>AI_plus_androgen</b>      | 0.8993<br>(0.566,<br>1.446)   | 0.9504<br>(0.5895,<br>1.528)  | 1.198<br>(0.7792,<br>1.867)  | 0.6622<br>(0.432,<br>1.026)   | 0.5873<br>(0.3708,<br>0.9269) | 1.058<br>(0.6758,<br>1.644)  | 0.8063<br>(0.4837,<br>1.347)  | 0.8891<br>(0.5459,<br>1.479)  | 1.863<br>(1.207,<br>2.899) | 1.455<br>(0.8184,<br>2.644) |
| 1.352<br>(1.085,<br>1.682)  | 1.112<br>(0.6915,<br>1.767)  | <b>AI_plus_FUL250</b>         | 1.051<br>(0.7588,<br>1.446)   | 1.33<br>(1.036,<br>1.703)    | 0.7352<br>(0.5711,<br>0.949)  | 0.6512<br>(0.4844,<br>0.8786) | 1.173<br>(0.8889,<br>1.55)   | 0.8913<br>(0.6138,<br>1.308)  | 0.9889<br>(0.704,<br>1.38)    | 2.068<br>(1.597,<br>2.677) | 1.617<br>(0.9934,<br>2.619) |
| 1.288<br>(1.024,<br>1.628)  | 1.052<br>(0.6544,<br>1.696)  | 0.9512<br>(0.6913,<br>1.318)  | <b>AI_plus_MAB</b>            | 1.267<br>(0.9868,<br>1.633)  | 0.7033<br>(0.5402,<br>0.9097) | 0.6199<br>(0.4625,<br>0.8378) | 1.118<br>(0.8512,<br>1.474)  | 0.8538<br>(0.5817,<br>1.243)  | 0.9371<br>(0.6719,<br>1.32)   | 1.973<br>(1.519,<br>2.562) | 1.54<br>(0.9618,<br>2.463)  |
| 1.019<br>(0.9132,<br>1.132) | 0.8346<br>(0.5355,<br>1.283) | 0.7517<br>(0.5871,<br>0.9652) | 0.7891<br>(0.6123,<br>1.013)  | <b>AI_plus_TKI</b>           | 0.5533<br>(0.4711,<br>0.6503) | 0.4906<br>(0.3937,<br>0.6124) | 0.8826<br>(0.7253,<br>1.072) | 0.6728<br>(0.49,<br>0.9329)   | 0.7446<br>(0.5657,<br>0.9779) | 1.558<br>(1.323,<br>1.839) | 1.217<br>(0.7844,<br>1.878) |
| 1.84<br>(1.629,<br>2.071)   | 1.51<br>(0.9745,<br>2.315)   | 1.36<br>(1.054,<br>1.751)     | 1.422<br>(1.099,<br>1.851)    | 1.807<br>(1.538,<br>2.123)   | <b>CDK4_or_6i_plus_AI</b>     | 0.8846<br>(0.7294, 1.07)      | 1.595<br>(1.324,<br>1.914)   | 1.214<br>(0.8909,<br>1.666)   | 1.342<br>(1.011,<br>1.769)    | 2.809<br>(2.357,<br>3.338) | 2.195<br>(1.427,<br>3.357)  |
| 2.077<br>(1.711,<br>2.513)  | 1.703<br>(1.079,<br>2.697)   | 1.536<br>(1.138,<br>2.064)    | 1.613<br>(1.194,<br>2.162)    | 2.038<br>(1.633,<br>2.54)    | 1.13<br>(0.9348,<br>1.371)    | <b>CDK4_or_6i_plus_FUL500</b> | 1.801<br>(1.538,<br>2.105)   | 1.371<br>(0.9989,<br>1.851)   | 1.515<br>(1.101,<br>2.077)    | 3.173<br>(2.514,<br>3.978) | 2.487<br>(1.571,<br>3.933)  |
| 1.153<br>(0.9767,<br>1.358) | 0.945<br>(0.6085,<br>1.48)   | 0.8527<br>(0.6451,<br>1.125)  | 0.8944<br>(0.6785,<br>1.175)  | 1.133<br>(0.9333,<br>1.379)  | 0.6268<br>(0.5226,<br>0.7555) | 0.5552<br>(0.4752,<br>0.6503) | <b>FUL500</b>                | 0.7631<br>(0.5842,<br>0.9961) | 0.8423<br>(0.6252,<br>1.138)  | 1.766<br>(1.426,<br>2.156) | 1.38<br>(0.8795,<br>2.153)  |
| 1.514<br>(1.115,<br>2.056)  | 1.24<br>(0.7426,<br>2.068)   | 1.122<br>(0.7645,<br>1.629)   | 1.171<br>(0.8045,<br>1.719)   | 1.486<br>(1.072,<br>2.041)   | 0.8234<br>(0.6004,<br>1.122)  | 0.7296<br>(0.5403,<br>1.001)  | 1.31<br>(1.004,<br>1.712)    | <b>Ful500_plus_PI3K</b>       | 1.106<br>(0.7464,<br>1.643)   | 2.316<br>(1.653,<br>3.188) | 1.803<br>(1.082,<br>3.034)  |

|                              |                              |                               |                               |                              |                               |                               |                               |                               |                               |                             |                              |
|------------------------------|------------------------------|-------------------------------|-------------------------------|------------------------------|-------------------------------|-------------------------------|-------------------------------|-------------------------------|-------------------------------|-----------------------------|------------------------------|
| 1.372<br>(1.06,<br>1.766)    | 1.125<br>(0.6763,<br>1.832)  | 1.011<br>(0.7248,<br>1.42)    | 1.067<br>(0.7577,<br>1.488)   | 1.343<br>(1.023,<br>1.768)   | 0.7454<br>(0.5653,<br>0.9886) | 0.6599<br>(0.4815,<br>0.9081) | 1.187<br>(0.8789,<br>1.599)   | 0.9043<br>(0.6088,<br>1.34)   | <b>HDAC_pl<br/>us_AI</b>      | 2.096<br>(1.588,<br>2.792)  | 1.633<br>(1.004,<br>2.669)   |
| 1.02<br>(0.9451,<br>1.102)   | 0.8361<br>(0.5456,<br>1.288) | 0.7538<br>(0.5938,<br>0.9504) | 0.79<br>(0.6215,<br>1.005)    | 0.9993<br>(0.8792,<br>1.148) | 0.5544<br>(0.4813,<br>0.637)  | 0.4901<br>(0.4007,<br>0.6038) | 0.8841<br>(0.7422,<br>1.062)  | 0.6741<br>(0.4908,<br>0.9302) | 0.7457<br>(0.5689,<br>0.9672) | 1.557<br>(1.346,<br>1.799)  | 1.219<br>(0.7988,<br>1.86)   |
| 0.6539<br>(0.579,<br>0.7416) | 0.5367<br>(0.345,<br>0.8285) | 0.4836<br>(0.3735,<br>0.6263) | 0.5069<br>(0.3903,<br>0.6581) | 0.6417<br>(0.5438,<br>0.756) | 0.356<br>(0.2995,<br>0.4243)  | 0.3152<br>(0.2514,<br>0.3977) | 0.5663<br>(0.4639,<br>0.7012) | 0.4318<br>(0.3137,<br>0.6048) | 0.477<br>(0.3581,<br>0.6298)  | <b>Tam</b>                  | 0.7778<br>(0.5224,<br>1.177) |
| 0.8367<br>(0.5527,<br>1.266) | 0.6875<br>(0.3782,<br>1.222) | 0.6184<br>(0.3819,<br>1.007)  | 0.6494<br>(0.4061,<br>1.04)   | 0.822<br>(0.5326,<br>1.275)  | 0.4556<br>(0.2979,<br>0.7008) | 0.4021<br>(0.2542,<br>0.6364) | 0.7247<br>(0.4644,<br>1.137)  | 0.5546<br>(0.3296,<br>0.9244) | 0.6125<br>(0.3747,<br>0.9962) | 1.286<br>(0.8494,<br>1.914) | <b>TKI_plus<br/>_Tam</b>     |

**eTable S2B. PFS effect estimates of ETS patients for pairwise comparisons: hazard ratio (95% credibility interval, CrI) (network 2)**

|                      |                        |
|----------------------|------------------------|
| FUL250               | 0.9024 (0.4463, 1.751) |
| 1.108 (0.571, 2.241) | TKI_plus_FUL250        |

**eTable S2C. OS effect estimates of ETS patients for pairwise comparisons: hazard ratio (95% credibility interval, CrI)**

|                           |                           |                                |                                    |                           |                           |                          |
|---------------------------|---------------------------|--------------------------------|------------------------------------|---------------------------|---------------------------|--------------------------|
| <b>AI</b>                 | 0.8699 (0.4467,<br>1.683) | 0.9414 (0.4559,<br>1.942)      | 0.4949 (0.2198, 1.091)             | 0.6981 (0.3675,<br>1.362) | 0.8907 (0.4603,<br>1.778) | 1.163 (0.7625,<br>1.874) |
| 1.15 (0.594, 2.239)       | <b>AI_plus_MAB</b>        | 1.08 (0.3944, 2.823)           | 0.5682 (0.1956, 1.561)             | 0.8085 (0.3092,<br>1.998) | 1.029 (0.4202,<br>2.639)  | 1.341 (0.5955,<br>2.96)  |
| 1.062 (0.5149,<br>2.193)  | 0.9258 (0.3542,<br>2.536) | <b>CDK4_or_6i_plus_<br/>AI</b> | 0.5225 (0.1764, 1.481)             | 0.7457 (0.2839,<br>1.908) | 0.9519 (0.3563,<br>2.536) | 1.239 (0.5288,<br>2.922) |
| 2.021 (0.9168,<br>4.551)  | 1.76 (0.6407, 5.113)      | 1.914 (0.6754, 5.669)          | <b>CDK4_or_6i_plus_FUL5<br/>00</b> | 1.422 (0.9003,<br>2.283)  | 1.8 (0.6627, 5.345)       | 2.364 (0.9377,<br>6.019) |
| 1.433 (0.7341,<br>2.721)  | 1.237 (0.5004,<br>3.234)  | 1.341 (0.524, 3.523)           | 0.7033 (0.438, 1.111)              | <b>FUL500</b>             | 1.262 (0.5017,<br>3.393)  | 1.678 (0.753,<br>3.716)  |
| 1.123 (0.5626,<br>2.173)  | 0.9716 (0.3789,<br>2.38)  | 1.051 (0.3942, 2.807)          | 0.5555 (0.1871, 1.509)             | 0.7926 (0.2947,<br>1.993) | <b>mTOR_plus_AI</b>       | 1.305 (0.586,<br>2.962)  |
| 0.8598 (0.5335,<br>1.311) | 0.7457 (0.3378,<br>1.679) | 0.8069 (0.3422,<br>1.891)      | 0.423 (0.1661, 1.066)              | 0.5959 (0.2691,<br>1.328) | 0.7664 (0.3376,<br>1.707) | <b>Tam</b>               |



**eTable S3A. PFS effect estimates of ETR patients for pairwise comparisons: hazard ratio (95% credibility interval, CrI) (network 1)**

| <b>AI</b>                        | 0.4795<br>(0.267<br>4,<br>0.8839<br>)        | 1.015<br>(0.6481<br>, 1.588)                                  | 0.5142<br>(0.353<br>9,<br>0.7414<br>)                       | 0.4259<br>(0.2788,<br>0.6538)                                  | 0.3763<br>(0.275<br>7,<br>0.5173<br>)     | 0.9537<br>(0.798<br>5,<br>1.145) | 0.9517<br>(0.731<br>7,<br>1.239)            | 0.8192<br>(0.530<br>1,<br>1.28)  | 0.7602<br>(0.517<br>9,<br>1.118) | 1.008<br>(0.810<br>5,<br>1.253)  | 0.6408<br>(0.473<br>6,<br>0.8661<br>) | 0.4747<br>(0.411,<br>0.5486<br>)      | 0.606<br>(0.377<br>6,<br>1.001) | 0.6065<br>(0.388<br>7,<br>0.9694<br>) | 0.7779<br>(0.563<br>9,<br>1.069) | 0.5595<br>(0.288<br>9,<br>1.13)  |
|----------------------------------|----------------------------------------------|---------------------------------------------------------------|-------------------------------------------------------------|----------------------------------------------------------------|-------------------------------------------|----------------------------------|---------------------------------------------|----------------------------------|----------------------------------|----------------------------------|---------------------------------------|---------------------------------------|---------------------------------|---------------------------------------|----------------------------------|----------------------------------|
| 2.086<br>(1.131,<br>3.74)        | <b>AKT_</b><br><b>plus_F</b><br><b>UL500</b> | 2.138<br>(1.003,<br>4.53)                                     | 1.079<br>(0.529<br>5,<br>2.127)                             | 0.8887<br>(0.5948,<br>1.353)                                   | 0.7844<br>(0.486<br>1,<br>1.294)          | 1.993<br>(1.056,<br>3.694)       | 1.996<br>(1.034,<br>3.833)                  | 1.712<br>(1.165,<br>2.547)       | 1.598<br>(0.761<br>2,<br>3.207)  | 2.114<br>(1.101,<br>3.952)       | 1.351<br>(0.698<br>7,<br>2.466)       | 0.9871<br>(0.551<br>6,<br>1.738)      | 1.265<br>(0.821<br>7,<br>1.949) | 1.267<br>(0.851<br>7,<br>1.923)       | 1.628<br>(0.820<br>3,<br>3.141)  | 1.172<br>(0.616<br>2,<br>2.248)  |
| 0.9852<br>(0.629<br>9,<br>1.543) | 0.4677<br>(0.220<br>7,<br>0.9971<br>)        | <b>Anti_a</b><br><b>ndroge</b><br><b>n_plus</b><br><b>_AI</b> | 0.5043<br>(0.286<br>1,<br>0.8956<br>)                       | 0.4188<br>(0.2278,<br>0.7675)                                  | 0.3708<br>(0.212<br>4,<br>0.6474<br>)     | 0.9393<br>(0.576<br>9,<br>1.514) | 0.9418<br>(0.558<br>1,<br>1.583)            | 0.8092<br>(0.431<br>5,<br>1.512) | 0.754<br>(0.416<br>8,<br>1.31)   | 0.9946<br>(0.606<br>6,<br>1.649) | 0.6312<br>(0.371<br>9,<br>1.099)      | 0.4669<br>(0.291<br>5,<br>0.7485<br>) | 0.595<br>(0.313<br>7,<br>1.145) | 0.5984<br>(0.315<br>8,<br>1.135)      | 0.7654<br>(0.442<br>8,<br>1.332) | 0.5539<br>(0.242<br>1,<br>1.267) |
| 1.945<br>(1.349,<br>2.825)       | 0.9265<br>(0.470<br>2,<br>1.889)             | 1.983<br>(1.117,<br>3.496)                                    | <b>CDK4</b><br><b>_or_6i</b><br><b>_plus_</b><br><b>_AI</b> | 0.8275<br>(0.4743,<br>1.47)                                    | 0.7348<br>(0.452<br>1,<br>1.192)          | 1.857<br>(1.238,<br>2.805)       | 1.86<br>(1.179,<br>2.902)                   | 1.596<br>(0.905<br>2,<br>2.857)  | 1.479<br>(0.864<br>9,<br>2.53)   | 1.962<br>(1.277,<br>3.031)       | 1.243<br>(0.773<br>9,<br>2.025)       | 0.9238<br>(0.616<br>6,<br>1.375)      | 1.173<br>(0.644<br>1,<br>2.182) | 1.184<br>(0.661<br>4,<br>2.122)       | 1.512<br>(0.939<br>6,<br>2.499)  | 1.09<br>(0.507<br>2,<br>2.397)   |
| 2.348<br>(1.529,<br>3.587)       | 1.125<br>(0.739<br>1,<br>1.681)              | 2.388<br>(1.303,<br>4.39)                                     | 1.208<br>(0.680<br>1,<br>2.108)                             | <b>CDK4_</b><br><b>or_6i_pl</b><br><b>us_FUL</b><br><b>500</b> | 0.8836<br>(0.666<br>3,<br>1.163)          | 2.236<br>(1.402,<br>3.569)       | 2.232<br>(1.365,<br>3.665)                  | 1.927<br>(1.691,<br>2.2)         | 1.782<br>(0.990<br>7,<br>3.186)  | 2.367<br>(1.463,<br>3.777)       | 1.505<br>(0.940<br>1,<br>2.386)       | 1.116<br>(0.737,<br>1.645)            | 1.426<br>(1.137,<br>1.786)      | 1.425<br>(1.21,<br>1.7)               | 1.828<br>(1.079,<br>3.118)       | 1.316<br>(0.779<br>6,<br>2.24)   |
| 2.657<br>(1.933,<br>3.628)       | 1.275<br>(0.772<br>6,<br>2.057)              | 2.697<br>(1.545,<br>4.708)                                    | 1.361<br>(0.839<br>1,<br>2.212)                             | 1.132<br>(0.8598,<br>1.501)                                    | <b>Chem</b><br><b>othera</b><br><b>py</b> | 2.542<br>(1.751,<br>3.659)       | 2.526<br>(1.701,<br>3.788)                  | 2.183<br>(1.604,<br>2.978)       | 2.022<br>(1.22,<br>3.307)        | 2.687<br>(1.815,<br>3.932)       | 1.707<br>(1.155,<br>2.478)            | 1.259<br>(0.945<br>3,<br>1.654)       | 1.614<br>(1.115,<br>2.322)      | 1.613<br>(1.171,<br>2.235)            | 2.07<br>(1.329,<br>3.21)         | 1.48<br>(0.828<br>8,<br>2.716)   |
| 1.049<br>(0.873<br>6,<br>1.252)  | 0.5019<br>(0.270<br>7,<br>0.9473<br>)        | 1.065<br>(0.6607<br>, 1.733)                                  | 0.5385<br>(0.356<br>5,<br>0.8077<br>)                       | 0.4472<br>(0.2802,<br>0.7135)                                  | 0.3934<br>(0.273<br>3,<br>0.5712<br>)     | <b>FUL2</b><br><b>50</b>         | 0.9983<br>(0.828,<br>1.196)                 | 0.8618<br>(0.530<br>5, 1.4)      | 0.7964<br>(0.525<br>3,<br>1.219) | 1.058<br>(0.794,<br>1.411)       | 0.6739<br>(0.469<br>6,<br>0.9562<br>) | 0.498<br>(0.391<br>5,<br>0.6277<br>)  | 0.6376<br>(0.382<br>4,<br>1.07) | 0.6379<br>(0.391,<br>1.035)           | 0.8168<br>(0.566<br>5,<br>1.179) | 0.584<br>(0.293<br>6,<br>1.216)  |
| 1.051<br>(0.807,<br>1.367)       | 0.5009<br>(0.260<br>9,<br>0.9672<br>)        | 1.062<br>(0.6318<br>, 1.792)                                  | 0.5375<br>(0.344<br>6,<br>0.8481<br>)                       | 0.4481<br>(0.2728,<br>0.7327)                                  | 0.3959<br>(0.264,<br>0.5879<br>)          | 1.002<br>(0.836<br>1,<br>1.208)  | <b>FUL2</b><br><b>50_plu</b><br><b>s_AI</b> | 0.8661<br>(0.514<br>7,<br>1.431) | 0.8016<br>(0.502<br>7,<br>1.251) | 1.056<br>(0.745<br>2,<br>1.491)  | 0.6726<br>(0.447<br>3,<br>1.008)      | 0.4966<br>(0.370<br>5,<br>0.6745<br>) | 0.6397<br>(0.375<br>6, 1.1)     | 0.6394<br>(0.379<br>4,<br>1.061)      | 0.8165<br>(0.546,<br>1.249)      | 0.5911<br>(0.284<br>7,<br>1.237) |

|                                  |                                       |                              |                                       |                               |                                       |                                  |                                  |                                 |                                  |                                 |                                       |                                       |                                        |                                         |                                  |                                  |
|----------------------------------|---------------------------------------|------------------------------|---------------------------------------|-------------------------------|---------------------------------------|----------------------------------|----------------------------------|---------------------------------|----------------------------------|---------------------------------|---------------------------------------|---------------------------------------|----------------------------------------|-----------------------------------------|----------------------------------|----------------------------------|
| 1.221<br>(0.781<br>1,<br>1.886)  | 0.5843<br>(0.392<br>7,<br>0.8585<br>) | 1.236<br>(0.6614<br>, 2.318) | 0.6264<br>(0.35,<br>1.105)            | 0.5189<br>(0.4546,<br>0.5913) | 0.458<br>(0.335<br>7,<br>0.6235<br>)  | 1.16<br>(0.714<br>4,<br>1.885)   | 1.155<br>(0.698<br>6,<br>1.943)  | <b>FUL5<br/>00</b>              | 0.9289<br>(0.505<br>2,<br>1.674) | 1.23<br>(0.741<br>2,<br>1.992)  | 0.7803<br>(0.471<br>4,<br>1.259)      | 0.5772<br>(0.371<br>5,<br>0.867)      | 0.7382<br>(0.610<br>5,<br>0.888)       | 0.7388<br>(0.668<br>3,<br>0.8201<br>)   | 0.9457<br>(0.550<br>8,<br>1.631) | 0.6818<br>(0.408<br>8,<br>1.153) |
| 1.315<br>(0.894<br>3,<br>1.931)  | 0.6257<br>(0.311<br>9,<br>1.314)      | 1.326<br>(0.7635<br>, 2.399) | 0.676<br>(0.395<br>2,<br>1.156)       | 0.5613<br>(0.3139,<br>1.009)  | 0.4944<br>(0.302<br>4,<br>0.8196<br>) | 1.256<br>(0.820<br>1,<br>1.904)  | 1.247<br>(0.799<br>2,<br>1.989)  | 1.077<br>(0.597<br>5,<br>1.98)  | <b>HDA<br/>C_plu<br/>s_AI</b>    | 1.321<br>(0.856<br>1,<br>2.076) | 0.845<br>(0.512<br>6,<br>1.381)       | 0.622<br>(0.411<br>6,<br>0.9423<br>)  | 0.7947<br>(0.427<br>2,<br>1.503)       | 0.7971<br>(0.438<br>4,<br>1.457)        | 1.022<br>(0.623<br>6,<br>1.688)  | 0.7382<br>(0.339<br>5,<br>1.656) |
| 0.9917<br>(0.797<br>8,<br>1.234) | 0.4731<br>(0.253,<br>0.9084<br>)      | 1.005<br>(0.6063<br>, 1.648) | 0.5096<br>(0.329<br>9,<br>0.7832<br>) | 0.4225<br>(0.2648,<br>0.6835) | 0.3722<br>(0.254<br>3,<br>0.5509<br>) | 0.9447<br>(0.708<br>7,<br>1.259) | 0.9474<br>(0.670<br>5,<br>1.342) | 0.813<br>(0.502,<br>1.349)      | 0.7571<br>(0.481<br>7,<br>1.168) | <b>MA</b>                       | 0.6368<br>(0.436<br>4,<br>0.9209<br>) | 0.4705<br>(0.360<br>6,<br>0.6144<br>) | 0.6005<br>(0.358<br>4,<br>1.027)       | 0.6019<br>(0.366<br>5,<br>1.008)        | 0.7734<br>(0.519<br>3,<br>1.143) | 0.5535<br>(0.272<br>7,<br>1.15)  |
| 1.561<br>(1.155,<br>2.111)       | 0.7404<br>(0.405<br>5,<br>1.431)      | 1.584<br>(0.9097<br>, 2.689) | 0.8045<br>(0.493<br>8,<br>1.292)      | 0.6644<br>(0.4192,<br>1.064)  | 0.5857<br>(0.403<br>6,<br>0.8657<br>) | 1.484<br>(1.046,<br>2.129)       | 1.487<br>(0.992,<br>2.235)       | 1.282<br>(0.794<br>6,<br>2.122) | 1.183<br>(0.724<br>3,<br>1.951)  | 1.57<br>(1.086,<br>2.291)       | <b>mTOR</b>                           | 0.7405<br>(0.567<br>1,<br>0.9596<br>) | 0.9459<br>(0.567<br>4,<br>1.608)       | 0.9495<br>(0.578<br>9,<br>1.572)        | 1.217<br>(0.781,<br>1.879)       | 0.8724<br>(0.434<br>8,<br>1.796) |
| 2.106<br>(1.823,<br>2.433)       | 1.013<br>(0.575<br>4,<br>1.813)       | 2.142<br>(1.336,<br>3.431)   | 1.082<br>(0.727<br>1,<br>1.622)       | 0.8963<br>(0.6079,<br>1.357)  | 0.7942<br>(0.604<br>5,<br>1.058)      | 2.008<br>(1.593,<br>2.554)       | 2.014<br>(1.482,<br>2.699)       | 1.732<br>(1.153,<br>2.691)      | 1.608<br>(1.061,<br>2.429)       | 2.126<br>(1.628,<br>2.774)      | 1.35<br>(1.042,<br>1.763)             | <b>mTOR<br/>_plus_<br/>AI</b>         | 1.277<br>(0.814<br>6,<br>2.048)        | 1.283<br>(0.841<br>5,<br>1.996)         | 1.64<br>(1.16,<br>2.309)         | 1.181<br>(0.615<br>1,<br>2.343)  |
| 1.65<br>(0.999,<br>2.648)        | 0.7907<br>(0.513,<br>1.217)           | 1.681<br>(0.8733<br>, 3.188) | 0.8523<br>(0.458<br>2,<br>1.553)      | 0.701<br>(0.5599,<br>0.8793)  | 0.6195<br>(0.430<br>6,<br>0.8966<br>) | 1.568<br>(0.934<br>5,<br>2.615)  | 1.563<br>(0.909,<br>2.662)       | 1.355<br>(1.126,<br>1.638)      | 1.258<br>(0.665<br>4,<br>2.341)  | 1.665<br>(0.973<br>4,<br>2.79)  | 1.057<br>(0.622,<br>1.762)            | 0.7829<br>(0.488<br>2,<br>1.228)      | <b>mTO<br/>R_plu<br/>s_FUL<br/>500</b> | 1.002<br>(0.809<br>8,<br>1.241)         | 1.287<br>(0.717<br>7,<br>2.279)  | 0.9258<br>(0.535<br>1,<br>1.612) |
| 1.649<br>(1.032,<br>2.573)       | 0.7894<br>(0.520<br>1,<br>1.174)      | 1.671<br>(0.8809<br>, 3.166) | 0.8447<br>(0.471<br>2,<br>1.512)      | 0.7015<br>(0.5881,<br>0.8268) | 0.6201<br>(0.447<br>4,<br>0.854)      | 1.568<br>(0.966<br>2,<br>2.558)  | 1.564<br>(0.942<br>2,<br>2.636)  | 1.354<br>(1.219,<br>1.496)      | 1.255<br>(0.686<br>4,<br>2.281)  | 1.661<br>(0.991<br>9,<br>2.729) | 1.053<br>(0.636<br>3,<br>1.728)       | 0.7797<br>(0.500<br>9,<br>1.188)      | 0.998<br>(0.805<br>6,<br>1.235)        | <b>PI3Ki<br/>_plus_<br/>FUL50<br/>0</b> | 1.277<br>(0.741<br>1,<br>2.24)   | 0.9213<br>(0.544<br>5,<br>1.598) |
| 1.285<br>(0.935<br>5,<br>1.773)  | 0.6144<br>(0.318<br>4,<br>1.219)      | 1.307<br>(0.751,<br>2.258)   | 0.6615<br>(0.400<br>1,<br>1.064)      | 0.5472<br>(0.3207,<br>0.927)  | 0.4831<br>(0.311<br>5,<br>0.7527<br>) | 1.224<br>(0.848<br>1,<br>1.765)  | 1.225<br>(0.800<br>7,<br>1.831)  | 1.057<br>(0.613<br>1,<br>1.815) | 0.9784<br>(0.592<br>5,<br>1.604) | 1.293<br>(0.874<br>8,<br>1.926) | 0.8214<br>(0.532<br>3,<br>1.28)       | 0.6099<br>(0.433<br>1,<br>0.8621<br>) | 0.777<br>(0.438<br>8,<br>1.393)        | 0.7831<br>(0.446<br>3,<br>1.349)        | <b>TKI_p<br/>lus_AI</b>          | 0.716<br>(0.341<br>9,<br>1.545)  |

|                                 |                                  |                              |                                  |                              |                                  |                                 |                                 |                                 |                                 |                                 |                            |                                  |                                |                                 |                                 |                                  |
|---------------------------------|----------------------------------|------------------------------|----------------------------------|------------------------------|----------------------------------|---------------------------------|---------------------------------|---------------------------------|---------------------------------|---------------------------------|----------------------------|----------------------------------|--------------------------------|---------------------------------|---------------------------------|----------------------------------|
| 1.787<br>(0.884<br>8,<br>3.461) | 0.8529<br>(0.444<br>8,<br>1.623) | 1.805<br>(0.7893<br>, 4.131) | 0.9177<br>(0.417<br>2,<br>1.972) | 0.7598<br>(0.4465,<br>1.283) | 0.6756<br>(0.368<br>2,<br>1.206) | 1.712<br>(0.822<br>4,<br>3.406) | 1.692<br>(0.808<br>6,<br>3.513) | 1.467<br>(0.867<br>3,<br>2.446) | 1.355<br>(0.603<br>8,<br>2.946) | 1.807<br>(0.869<br>7,<br>3.667) | 1.146<br>(0.556<br>9, 2.3) | 0.8465<br>(0.426<br>9,<br>1.626) | 1.08<br>(0.620<br>2,<br>1.869) | 1.085<br>(0.625<br>9,<br>1.836) | 1.397<br>(0.647<br>4,<br>2.925) | <b>TKI_p<br/>lus_F<br/>UL500</b> |
|---------------------------------|----------------------------------|------------------------------|----------------------------------|------------------------------|----------------------------------|---------------------------------|---------------------------------|---------------------------------|---------------------------------|---------------------------------|----------------------------|----------------------------------|--------------------------------|---------------------------------|---------------------------------|----------------------------------|

**eTable S3B. PFS effect estimates of ETR patients for pairwise comparisons: hazard ratio (95% credibility interval, CrI) (network 2)**

**Random effect model**

|                        |                       |                        |
|------------------------|-----------------------|------------------------|
| <b>mTOR_plus_TAM</b>   | 1.858 (0.7885, 4.346) | 1.751 (0.4054, 7.214)  |
| 0.5381 (0.2301, 1.268) | <b>TAM</b>            | 0.9566 (0.3022, 2.927) |
| 0.571 (0.1386, 2.467)  | 1.045 (0.3417, 3.309) | <b>TKI_plus_TAM</b>    |

**Fixed effect model**

|                         |                      |                        |
|-------------------------|----------------------|------------------------|
| <b>mTOR_plus_TAM</b>    | 1.849 (1.223, 2.768) | 1.759 (0.6957, 4.483)  |
| 0.5407 (0.3613, 0.8175) | <b>TAM</b>           | 0.9552 (0.4131, 2.195) |
| 0.5686 (0.2231, 1.437)  | 1.047 (0.4555, 2.42) | <b>TKI_plus_TAM</b>    |

**eTable S3C. OS effect estimates of ETR patients for pairwise comparisons: hazard ratio (95% credibility interval, CrI) (network 1)**

|                             |                                  |                                     |                                         |                               |                             |                              |                            |                            |                              |                              |                             |                              |
|-----------------------------|----------------------------------|-------------------------------------|-----------------------------------------|-------------------------------|-----------------------------|------------------------------|----------------------------|----------------------------|------------------------------|------------------------------|-----------------------------|------------------------------|
| <b>AI</b>                   | 0.5275<br>(0.251,<br>1.129)      | 1.005<br>(0.4348,<br>2.391)         | 0.7383<br>(0.4552,<br>1.189)            | 0.6681<br>(0.4669,<br>0.9571) | 1.08<br>(0.6364,<br>1.814)  | 0.8981<br>(0.5434,<br>1.499) | 1.084<br>(0.853,<br>1.373) | 1.773<br>(1.259,<br>2.503) | 0.701<br>(0.4899,<br>0.9982) | 0.6376<br>(0.3516,<br>1.186) | 0.784<br>(0.4648,<br>1.332) | 0.7261<br>(0.2942,<br>1.714) |
| 1.896<br>(0.8861,<br>3.984) | <b>AKT_plu<br/>s_FUL50<br/>0</b> | 1.919<br>(0.6054,<br>5.999)         | 1.385<br>(0.7852,<br>2.453)             | 1.257<br>(0.6555,<br>2.377)   | 2.028<br>(0.8051,<br>5.08)  | 1.694<br>(0.9734,<br>2.926)  | 2.052<br>(0.9315,<br>4.42) | 3.351<br>(1.473,<br>7.61)  | 1.328<br>(0.6052,<br>2.865)  | 1.214<br>(0.617,<br>2.305)   | 1.469<br>(0.8305,<br>2.588) | 1.369<br>(0.5382,<br>3.414)  |
| 0.9953<br>(0.4182,<br>2.3)  | 0.521<br>(0.1667,<br>1.652)      | <b>CDK4_or<br/>_6i_plus_<br/>AI</b> | 0.7322<br>(0.2699,<br>1.934)            | 0.6583<br>(0.2601,<br>1.655)  | 1.081<br>(0.3843,<br>2.885) | 0.8903<br>(0.3278,<br>2.376) | 1.08<br>(0.4482,<br>2.578) | 1.77<br>(0.7021,<br>4.401) | 0.6962<br>(0.2743,<br>1.731) | 0.6315<br>(0.2249,<br>1.781) | 0.78<br>(0.2774,<br>2.082)  | 0.7265<br>(0.2004,<br>2.48)  |
| 1.354<br>(0.8411,<br>2.197) | 0.7223<br>(0.4077,<br>1.274)     | 1.366<br>(0.5169,<br>3.706)         | <b>CDK4_or_6<br/>i_plus_FUL<br/>500</b> | 0.9035<br>(0.6648,<br>1.256)  | 1.465<br>(0.7036,<br>2.98)  | 1.218<br>(1.045,<br>1.414)   | 1.478<br>(0.866,<br>2.495) | 2.403<br>(1.324,<br>4.336) | 0.952<br>(0.5603,<br>1.635)  | 0.8677<br>(0.5969,<br>1.266) | 1.058<br>(0.8432,<br>1.332) | 0.9929<br>(0.4735,<br>1.999) |

|                               |                               |                              |                               |                               |                              |                               |                              |                                  |                               |                                   |                                    |                                  |
|-------------------------------|-------------------------------|------------------------------|-------------------------------|-------------------------------|------------------------------|-------------------------------|------------------------------|----------------------------------|-------------------------------|-----------------------------------|------------------------------------|----------------------------------|
| 1.497<br>(1.045,<br>2.142)    | 0.7956<br>(0.4207,<br>1.525)  | 1.519<br>(0.6041,<br>3.845)  | 1.107<br>(0.7959,<br>1.504)   | <b>Chemoth<br/>erapy</b>      | 1.623<br>(0.8432,<br>3.06)   | 1.344<br>(0.938,<br>1.895)    | 1.629<br>(1.058,<br>2.479)   | 2.658<br>(1.614,<br>4.409)       | 1.048<br>(0.694,<br>1.595)    | 0.9571<br>(0.5932,<br>1.574)      | 1.174<br>(0.7976,<br>1.719)        | 1.093<br>(0.4813,<br>2.377)      |
| 0.9259<br>(0.5511,<br>1.571)  | 0.493<br>(0.1968,<br>1.242)   | 0.9251<br>(0.3466,<br>2.602) | 0.6825<br>(0.3355,<br>1.421)  | 0.616<br>(0.3268,<br>1.186)   | <b>FUL250_<br/>plus_AI</b>   | 0.832<br>(0.3998,<br>1.77)    | 0.9985<br>(0.5771,<br>1.795) | 1.641<br>(0.8866,<br>3.07)       | 0.6503<br>(0.3466,<br>1.204)  | 0.5881<br>(0.2666,<br>1.379)      | 0.7247<br>(0.3385,<br>1.545)       | 0.6758<br>(0.2442,<br>1.823)     |
| 1.113<br>(0.667,<br>1.84)     | 0.5903<br>(0.3418,<br>1.027)  | 1.123<br>(0.4208,<br>3.051)  | 0.8209<br>(0.7071,<br>0.9571) | 0.7439<br>(0.5277,<br>1.066)  | 1.202<br>(0.565,<br>2.501)   | <b>FUL500</b>                 | 1.214<br>(0.6929,<br>2.092)  | 1.981<br>(1.06,<br>3.605)        | 0.7763<br>(0.4526,<br>1.363)  | 0.712<br>(0.5041,<br>1.013)       | 0.8702<br>(0.7411,<br>1.031)       | 0.807<br>(0.3871,<br>1.638)      |
| 0.9221<br>(0.7281,<br>1.172)  | 0.4873<br>(0.2262,<br>1.073)  | 0.9262<br>(0.3879,<br>2.231) | 0.6767<br>(0.4008,<br>1.155)  | 0.6141<br>(0.4034,<br>0.9447) | 1.002<br>(0.5572,<br>1.733)  | 0.8235<br>(0.478,<br>1.443)   | <b>MA</b>                    | 1.627<br>(1.099,<br>2.484)       | 0.6455<br>(0.4217,<br>0.9864) | 0.5854<br>(0.314,<br>1.123)       | 0.7183<br>(0.4093,<br>1.29)        | 0.6696<br>(0.2626,<br>1.645)     |
| 0.5641<br>(0.3994,<br>0.7941) | 0.2984<br>(0.1314,<br>0.6787) | 0.565<br>(0.2272,<br>1.424)  | 0.4162<br>(0.2306,<br>0.7555) | 0.3762<br>(0.2268,<br>0.6197) | 0.6094<br>(0.3257,<br>1.128) | 0.5049<br>(0.2774,<br>0.9436) | 0.6146<br>(0.4025,<br>0.91)  | <b>MAB_pl<br/>us_FUL<br/>250</b> | 0.395<br>(0.2437,<br>0.6491)  | 0.3609<br>(0.1828,<br>0.7412)     | 0.4394<br>(0.236,<br>0.8416)       | 0.4077<br>(0.1555,<br>1.059)     |
| 1.426<br>(1.002,<br>2.041)    | 0.7528<br>(0.3491,<br>1.652)  | 1.436<br>(0.5776,<br>3.646)  | 1.05<br>(0.6117,<br>1.785)    | 0.954<br>(0.627,<br>1.441)    | 1.538<br>(0.8308,<br>2.885)  | 1.288<br>(0.7338,<br>2.209)   | 1.549<br>(1.014,<br>2.371)   | 2.532<br>(1.541,<br>4.103)       | <b>mTOR</b>                   | 0.9087<br>(0.4825,<br>1.726)      | 1.119<br>(0.6295,<br>1.994)        | 1.036<br>(0.4219,<br>2.589)      |
| 1.126<br>(0.9292,<br>1.386)   | 0.5943<br>(0.2927,<br>1.238)  | 1.133<br>(0.4788,<br>2.792)  | 0.8275<br>(0.5387,<br>1.281)  | 0.7517<br>(0.5595,<br>1.014)  | 1.214<br>(0.6958,<br>2.119)  | 1.011<br>(0.6362,<br>1.605)   | 1.22<br>(0.8971,<br>1.665)   | 1.999<br>(1.365,<br>2.963)       | 0.7867<br>(0.5867,<br>1.049)  | 0.7176<br>(0.4094,<br>1.279)      | 0.8808<br>(0.5439,<br>1.437)       | 0.8214<br>(0.3413,<br>1.885)     |
| 1.568<br>(0.8429,<br>2.845)   | 0.8239<br>(0.4339,<br>1.621)  | 1.583<br>(0.5615,<br>4.447)  | 1.152 (0.79,<br>1.675)        | 1.045<br>(0.6352,<br>1.686)   | 1.7<br>(0.7254,<br>3.751)    | 1.404<br>(0.9874,<br>1.984)   | 1.708<br>(0.8902,<br>3.185)  | 2.771<br>(1.349,<br>5.471)       | 1.1<br>(0.5794,<br>2.073)     | <b>mTOR_p<br/>lus_FUL5<br/>00</b> | 1.218<br>(0.8281,<br>1.799)        | 1.141<br>(0.4925,<br>2.507)      |
| 1.276<br>(0.751,<br>2.152)    | 0.6806<br>(0.3863,<br>1.204)  | 1.282<br>(0.4804,<br>3.604)  | 0.9451<br>(0.7509,<br>1.186)  | 0.8521<br>(0.5817,<br>1.254)  | 1.38<br>(0.6474,<br>2.954)   | 1.149<br>(0.9704,<br>1.349)   | 1.392<br>(0.7753,<br>2.443)  | 2.276<br>(1.188,<br>4.237)       | 0.8939<br>(0.5014,<br>1.589)  | 0.8208<br>(0.556,<br>1.208)       | <b>PI3Ki_pl<br/>us_FUL5<br/>00</b> | 0.9359<br>(0.4362,<br>1.912)     |
| 1.377<br>(0.5835,<br>3.399)   | 0.7304<br>(0.293,<br>1.858)   | 1.376<br>(0.4032,<br>4.99)   | 1.007<br>(0.5004,<br>2.112)   | 0.9148<br>(0.4207,<br>2.078)  | 1.48<br>(0.5486,<br>4.095)   | 1.239<br>(0.6105,<br>2.583)   | 1.493<br>(0.6079,<br>3.807)  | 2.453<br>(0.9445,<br>6.431)      | 0.965<br>(0.3862,<br>2.37)    | 0.8768<br>(0.3989,<br>2.03)       | 1.068<br>(0.523,<br>2.292)         | <b>TKI_plu<br/>s_FUL50<br/>0</b> |

**eTable S3D. OS effect estimates of ETR patients for pairwise comparisons: hazard ratio (95% credibility interval, CrI) (network 2)**

|                        |                       |
|------------------------|-----------------------|
| <b>mTOR_plus_TAM</b>   | 2.214 (0.7181, 6.633) |
| 0.4518 (0.1508, 1.393) | <b>TAM</b>            |

**eTable S4. SUCRA values of PFS for CDK4/6 inhibitors in ETS patients**

| Treatment    | Sucra value FE |
|--------------|----------------|
| Abe_plus_AI  | 0.9430         |
| Pal_plus_AI  | 0.7157         |
| Rib_plus_AI  | 0.6805         |
| Pal_plus_Ful | 0.5872         |
| Rib_plus_Ful | 0.3573         |
| AI           | 0.2139         |
| Ful          | 0.0023         |

**eTable S5. Effect estimates of PFS for CDK4/6 inhibitors in ETS patients: hazard ratio (95% credibility interval, CrI)**

|                         |                         |                      |                         |                         |                         |                         |
|-------------------------|-------------------------|----------------------|-------------------------|-------------------------|-------------------------|-------------------------|
| <b>Abe_plus_AI</b>      | 1.905 (1.522, 2.392)    | 2.991 (1.886, 4.688) | 1.22 (0.9062, 1.658)    | 1.35 (0.9114, 1.96)     | 1.245 (0.842, 1.852)    | 1.657 (0.9602, 2.776)   |
| 0.5248 (0.418, 0.6568)  | <b>AI</b>               | 1.572 (1.046, 2.329) | 0.6409 (0.5275, 0.7793) | 0.7064 (0.51, 0.9607)   | 0.6541 (0.4729, 0.9063) | 0.8683 (0.529, 1.388)   |
| 0.3343 (0.2133, 0.5303) | 0.6361 (0.4293, 0.9557) | <b>Ful</b>           | 0.4096 (0.2943, 0.5851) | 0.4506 (0.3554, 0.5682) | 0.4151 (0.2541, 0.7098) | 0.5511 (0.4189, 0.7195) |
| 0.8195 (0.603, 1.104)   | 1.56 (1.283, 1.896)     | 2.442 (1.709, 3.398) | <b>Pal_plus_AI</b>      | 1.1 (0.85, 1.407)       | 1.018 (0.6985, 1.492)   | 1.351 (0.8656, 2.074)   |
| 0.7408 (0.5103, 1.097)  | 1.416 (1.041, 1.961)    | 2.219 (1.76, 2.814)  | 0.9091 (0.7109, 1.177)  | <b>Pal_plus_Ful</b>     | 0.9306 (0.5946, 1.481)  | 1.226 (0.8575, 1.755)   |
| 0.8035 (0.5401, 1.188)  | 1.529 (1.103, 2.115)    | 2.409 (1.409, 3.936) | 0.9824 (0.6701, 1.432)  | 1.075 (0.6752, 1.682)   | <b>Rib_plus_AI</b>      | 1.319 (0.7262, 2.369)   |
| 0.6035 (0.3602, 1.041)  | 1.152 (0.7206, 1.89)    | 1.815 (1.39, 2.387)  | 0.7401 (0.4823, 1.155)  | 0.8154 (0.5699, 1.166)  | 0.7581 (0.4221, 1.377)  | <b>Rib_plus_Ful</b>     |

**eTable S6. SUCRA values for PI3ki in ETS patients**

| Treatment    | Sucra value FE |
|--------------|----------------|
| Bup_plus_Ful | 0.7972         |
| Alp_plus_Ful | 0.5011         |
| Ful          | 0.2017         |

**eTable S7. Effect estimates of PFS for PI3ki in ETS patients hazard ratio (95% credibility interval, CrI)**

|                       |                        |                       |
|-----------------------|------------------------|-----------------------|
| <b>Alp_plus_Ful</b>   | 0.8673 (0.2995, 2.474) | 1.156 (0.4371, 3)     |
| 1.153 (0.4042, 3.338) | <b>Bup_plus_Ful</b>    | 1.334 (0.8531, 2.074) |
| 0.865 (0.3333, 2.288) | 0.7496 (0.4822, 1.172) | <b>Ful</b>            |

**eTable S8. SUCRA values of PFS for HDACi in ETS patients**

| Treatment   | Sucra value FE |
|-------------|----------------|
| Tuc_plus_AI | 0.8886         |
| Ent_plus_AI | 0.4870         |
| AI          | 0.1244         |

**eTable S9. Effect estimates of PFS for HDACi in ETS patients hazard ratio (95% credibility interval, CrI)**

|                       |                        |                        |
|-----------------------|------------------------|------------------------|
| <b>AI</b>             | 0.8521 (0.4475, 1.617) | 0.6817 (0.3877, 1.191) |
| 1.174 (0.6185, 2.235) | <b>Ent_plus_AI</b>     | 0.8012 (0.3419, 1.878) |
| 1.467 (0.84, 2.58)    | 1.248 (0.5326, 2.925)  | <b>Tuc_plus_AI</b>     |

**eTable S10. SUCRA of PFS for visceral metastases in ETS patients**

| Treatment               | Sucra value FE |
|-------------------------|----------------|
| CDK4_or_6i_plus_AI      | 0.9172         |
| CDK4_or_6i_plus_Ful_500 | 0.7795         |

|             |        |
|-------------|--------|
| Tam         | 0.6726 |
| AI_plus_MAB | 0.6181 |
| Ful_500     | 0.2008 |
| AI          | 0.1881 |
| Ful         | 0.1237 |

**eTable S11. Effect estimates of PFS for visceral metastases in ETS patients: hazard ratio (95% credibility interval, CrI)**

|                        |                         |                           |                                |                       |                        |                         |
|------------------------|-------------------------|---------------------------|--------------------------------|-----------------------|------------------------|-------------------------|
| <b>AI</b>              | 0.6908 (0.5272, 0.904)  | 0.5562 (0.4414, 0.7032)   | 0.6018 (0.4576, 0.7973)        | 1.051 (0.8186, 1.355) | 0.9887 (0.7402, 1.325) | 0.6575 (0.5399, 0.7982) |
| 1.448 (1.106, 1.897)   | <b>AI_plus_MAB</b>      | 0.8052 (0.5635, 1.148)    | 0.8723 (0.5919, 1.283)         | 1.524 (1.055, 2.188)  | 1.432 (0.9619, 2.131)  | 0.9513 (0.6843, 1.327)  |
| 1.798 (1.422, 2.266)   | 1.242 (0.8708, 1.775)   | <b>CDK4_or_6i_plus_AI</b> | 1.083 (0.8681, 1.351)          | 1.89 (1.424, 2.516)   | 1.778 (1.224, 2.58)    | 1.181 (0.8693, 1.596)   |
| 1.662 (1.254, 2.186)   | 1.146 (0.7793, 1.689)   | 0.9234 (0.7404, 1.152)    | <b>CDK4_or_6i_plus_Ful_500</b> | 1.748 (1.333, 2.283)  | 1.643 (1.096, 2.459)   | 1.092 (0.776, 1.526)    |
| 0.9513 (0.7378, 1.222) | 0.6562 (0.4571, 0.9478) | 0.5292 (0.3974, 0.7025)   | 0.572 (0.438, 0.7501)          | <b>Ful</b>            | 0.9411 (0.6408, 1.383) | 0.6253 (0.4534, 0.8568) |
| 1.011 (0.7546, 1.351)  | 0.6981 (0.4693, 1.04)   | 0.5624 (0.3876, 0.8172)   | 0.6086 (0.4067, 0.9123)        | 1.063 (0.7231, 1.561) | <b>Ful_500</b>         | 0.6645 (0.4669, 0.9431) |
| 1.521 (1.253, 1.852)   | 1.051 (0.7534, 1.461)   | 0.8464 (0.6264, 1.15)     | 0.9161 (0.6552, 1.289)         | 1.599 (1.167, 2.205)  | 1.505 (1.06, 2.142)    | <b>Tam</b>              |

**eTable S12. SUCRA values of PFS for bone metastases in ETS patients**

| Treatment               | Sucra value FE |
|-------------------------|----------------|
| CDK4_or_6i_plus_Ful_500 | 0.9019         |
| CDK4_or_6i_plus_AI      | 0.8726         |
| Ful                     | 0.4496         |
| Tam                     | 0.4397         |
| AI_plus_MAB             | 0.1995         |
| AI                      | 0.1367         |

**eTable S13. Effect estimates of PFS for bone metastases in ETS patients: hazard ratio (95% credibility interval, CrI)**

|                       |                        |                           |                                |                        |                         |
|-----------------------|------------------------|---------------------------|--------------------------------|------------------------|-------------------------|
| <b>AI</b>             | 0.9878 (0.5946, 1.646) | 0.4418 (0.2824, 0.6906)   | 0.4284 (0.2391, 0.7655)        | 0.7174 (0.3415, 1.494) | 0.7937 (0.6431, 0.9828) |
| 1.012 (0.6074, 1.682) | <b>AI_plus_MAB</b>     | 0.4477 (0.2244, 0.878)    | 0.4345 (0.2011, 0.9366)        | 0.7248 (0.2959, 1.771) | 0.8051 (0.4635, 1.394)  |
| 2.264 (1.448, 3.541)  | 2.234 (1.139, 4.456)   | <b>CDK4_or_6i_plus_AI</b> | 0.9721 (0.673, 1.406)          | 1.623 (0.9076, 2.895)  | 1.798 (1.1, 2.962)      |
| 2.334 (1.306, 4.183)  | 2.301 (1.068, 4.974)   | 1.029 (0.7113, 1.486)     | <b>CDK4_or_6i_plus_Ful_500</b> | 1.67 (1.062, 2.626)    | 1.848 (0.9934, 3.449)   |
| 1.394 (0.6693, 2.929) | 1.38 (0.5648, 3.38)    | 0.616 (0.3454, 1.102)     | 0.5989 (0.3808, 0.9419)        | <b>Ful</b>             | 1.107 (0.514, 2.397)    |
| 1.26 (1.018, 1.555)   | 1.242 (0.7172, 2.158)  | 0.5563 (0.3376, 0.9091)   | 0.541 (0.29, 1.007)            | 0.9032 (0.4171, 1.946) | <b>Tam</b>              |

**eTable S14. SUCRA values of PFS for CDK4/6 inhibitors in ETR patients (Network 1)**

| Treatment       | Sucra value FE |
|-----------------|----------------|
| Dal_plus_FUL500 | 0.8995         |
| Abe_plus_FUL500 | 0.6545         |
| Chemotherapy    | 0.5685         |
| Rib_plus_FUL500 | 0.5032         |
| Pal_plus_FUL500 | 0.3587         |
| FUL500          | 0.015          |

**eTable S15. Effect estimates of PFS for CDK4/6 inhibitors in ETR patients: hazard ratio (95% credibility interval, CrI) (Network 1)**

|                        |                        |                         |                       |                        |                         |
|------------------------|------------------------|-------------------------|-----------------------|------------------------|-------------------------|
| <b>Abe_plus_FUL500</b> | 1.094 (0.604, 2.011)   | 0.8141 (0.5675, 1.169)  | 1.937 (1.597, 2.327)  | 1.238 (0.7264, 2.126)  | 1.108 (0.7986, 1.516)   |
| 0.9142 (0.4973, 1.656) | <b>Chemotherapy</b>    | 0.7458 (0.387, 1.409)   | 1.764 (0.9818, 3.16)  | 1.128 (0.8451, 1.498)  | 1.013 (0.5314, 1.907)   |
| 1.228 (0.8558, 1.762)  | 1.341 (0.7099, 2.584)  | <b>Dal_plus_FUL500</b>  | 2.386 (1.749, 3.217)  | 1.514 (0.8438, 2.757)  | 1.359 (0.9176, 1.997)   |
| 0.5162 (0.4297, 0.626) | 0.5668 (0.3164, 1.019) | 0.4191 (0.3108, 0.5719) | <b>FUL500</b>         | 0.636 (0.3837, 1.066)  | 0.5719 (0.4389, 0.7403) |
| 0.808 (0.4703, 1.377)  | 0.8867 (0.6677, 1.183) | 0.6603 (0.3628, 1.185)  | 1.572 (0.9378, 2.606) | <b>Pal_plus_FUL500</b> | 0.8949 (0.5068, 1.589)  |
| 0.9023 (0.6595, 1.252) | 0.9869 (0.5243, 1.882) | 0.7357 (0.5006, 1.09)   | 1.749 (1.351, 2.278)  | 1.117 (0.6292, 1.973)  | <b>Rib_plus_FUL500</b>  |

**eTable S16. SUCRA values of PFS for CDK4/6 inhibitors in ETR patients (Network 2)**

| Treatment   | Sucra value FE |
|-------------|----------------|
| Rib_plus_AI | 0.9266         |
| Pal_plus_AI | 0.5732         |



|    |        |
|----|--------|
| AI | 0.0001 |
|----|--------|

**eTable S17. Effect estimates of PFS for CDK4/6 inhibitors in ETR patients: hazard ratio (95% credibility interval, CrI) (Network 2)**

|                      |                         |                        |
|----------------------|-------------------------|------------------------|
| <b>AI</b>            | 0.5165 (0.3513, 0.7492) | 0.377 (0.2357, 0.5942) |
| 1.936 (1.335, 2.846) | <b>Pal_plus_AI</b>      | 0.7318 (0.4067, 1.311) |
| 2.653 (1.683, 4.243) | 1.367 (0.7628, 2.459)   | <b>Rib_plus_AI</b>     |

**eTable S18. SUCRA values of PFS for PI3ki in ETR patients**

| Treatment       | Sucra value FE |
|-----------------|----------------|
| Bup_plus_FUL500 | 0.7573         |
| Alp_plus_FUL500 | 0.7078         |
| Pic_plus_FUL500 | 0.4702         |
| FUL500          | 0.0647         |

**eTable S19. Effect estimates of PFS for PI3ki in ETR patients: hazard ratio (95% credibility interval, CrI)**

|                        |                         |                       |                        |
|------------------------|-------------------------|-----------------------|------------------------|
| <b>Alp_plus_FUL500</b> | 1.054 (0.504, 2.253)    | 1.573 (0.7549, 3.328) | 1.248 (0.5724, 2.751)  |
| 0.9489 (0.4438, 1.984) | <b>Bup_plus_FUL500</b>  | 1.496 (1.187, 1.858)  | 1.196 (0.8046, 1.759)  |
| 0.6358 (0.3004, 1.325) | 0.6686 (0.5383, 0.8427) | <b>FUL500</b>         | 0.8002 (0.58, 1.092)   |
| 0.8014 (0.3635, 1.747) | 0.8361 (0.5684, 1.243)  | 1.25 (0.9154, 1.724)  | <b>Pic_plus_FUL500</b> |

**eTable S20. SUCRA values of PFS for HDACi in ETR patients**

| Treatment   | Sucra value FE |
|-------------|----------------|
| Ent_plus_AI | 0.9590         |
| Tuc_plus_AI | 0.3507         |
| AI          | 0.1903         |

**eTable S21. Effect estimates of PFS for HDACi in ETR patients: hazard ratio (95% credibility interval, CrI)**

|                       |                        |                        |
|-----------------------|------------------------|------------------------|
| <b>AI</b>             | 0.4713 (0.1493, 1.486) | 0.9185 (0.3334, 2.554) |
| 2.122 (0.6729, 6.699) | <b>Ent_plus_AI</b>     | 1.944 (0.4203, 9.124)  |
| 1.089 (0.3915, 3)     | 0.5143 (0.1096, 2.379) | <b>Tuc_plus_AI</b>     |

**eTable S22. SUCRA values of PFS for visceral metastases in ETR patients (network 1)**

| Treatment              | Sucra value FE |
|------------------------|----------------|
| CDK4_OR_6i_plus_FUL500 | 0.9999         |
| PI3KI_plus_Ful500      | 0.4998         |
| FUL500                 | 0.0002         |

**eTable S23. Effect estimates of PFS for visceral metastases in ETR patients: hazard ratio (95% credibility interval, CrI) (network 1)**

|                               |                      |                          |
|-------------------------------|----------------------|--------------------------|
| <b>CDK4_OR_6i_plus_FUL500</b> | 2.12 (1.733, 2.597)  | 1.607 (1.239, 2.091)     |
| 0.4717 (0.3851, 0.5772)       | <b>FUL500</b>        | 0.7582 (0.6406, 0.8958)  |
| 0.6221 (0.4782, 0.8071)       | 1.319 (1.116, 1.561) | <b>PI3KI_plus_Ful500</b> |

**eTable S24. SUCRA values of PFS for visceral metastases in ETR patients (network 2)**

| Treatment    | Sucra value using RE |
|--------------|----------------------|
| mTOR_plus_AI | 0.9497               |
| AI           | 0.0502               |

**eTable S25. Effect estimates of PFS for visceral metastases in ETR patients: hazard ratio (95% credibility interval, CrI) (network 2)**

|                       |                        |
|-----------------------|------------------------|
| <b>AI</b>             | 0.4702 (0.1801, 1.244) |
| 2.127 (0.8041, 5.553) | <b>mTOR_plus_AI</b>    |

**eTable S26. SUCRA values of PFS for bone metastases in ETR patients (network 1)**

| Treatment              | Sucra value FE |
|------------------------|----------------|
| CDK4_OR_6i_plus_FUL500 | 0.9364         |
| PI3K_plus_Ful500       | 0.5602         |
| FUL500                 | 0.0033         |

**eTable S27. Effect estimates of PFS for bone metastases in ETR patients: hazard ratio (95% credibility interval, CrI) (network 1)**

|                               |                      |                         |
|-------------------------------|----------------------|-------------------------|
| <b>CDK4_OR_6i_plus_FUL500</b> | 1.932 (1.379, 2.71)  | 1.307 (0.8307, 2.057)   |
| 0.5177 (0.369, 0.7253)        | <b>FUL500</b>        | 0.6766 (0.4989, 0.9202) |
| 0.7649 (0.4862, 1.204)        | 1.478 (1.087, 2.004) | <b>PI3K_plus_Ful500</b> |

**eTable S28. SUCRA values of PFS for bone metastases in ETR patients (network 2)**

| Treatment    | Sucra value RE |
|--------------|----------------|
| mTOR_plus_AI | 0.9469         |
| AI           | 0.053          |

**eTable S29. Effect estimates of PFS for bone metastases in ETR patients: hazard ratio (95% credibility interval, CrI) (network 2)**

|                       |                         |
|-----------------------|-------------------------|
| <b>AI</b>             | 0.3285 (0.07777, 1.411) |
| 3.044 (0.7089, 12.86) | <b>mTOR_plus_AI</b>     |

**eTable S30. SUCRA values of PFS for post-menopausal women in ETR patients (network 1)**

| Treatment              | Sucra value FE |
|------------------------|----------------|
| Chemotherapy           | 0.9633         |
| CDK4_OR_6i_plus_FUL500 | 0.8865         |
| mTOR_plus_AI           | 0.8111         |
| AKT_plus_FUL           | 0.7800         |
| CDK4_OR_6i_plus_AI     | 0.7329         |
| TKI_plus_FUL500        | 0.6446         |
| mTOR_plus_FUL500       | 0.5891         |
| PI3Ki_plus_Ful500      | 0.5846         |
| mTOR                   | 0.5672         |
| HDAC_plus_AI           | 0.4169         |
| TKI_plus_AI            | 0.3991         |
| FUL500                 | 0.3036         |
| FUL_250_plus_AI        | 0.2010         |
| FUL250                 | 0.2000         |
| Anti_androgen_plus_AI  | 0.1518         |
| MA                     | 0.1368         |
| AI                     | 0.1309         |

**eTable S31. Effect estimates of PFS for post-menopausal women in ETR patients: hazard ratio (95% credibility interval, CrI) (network 1)**

| AI                              | 0.475<br>(0.2672<br>,<br>0.8634) | 1.019<br>(0.6635,<br>1.581)  | 0.5106<br>(0.3529<br>,<br>0.7428) | 0.4177<br>(0.2755,<br>0.6317) | 0.3694<br>(0.2676<br>, 0.502)     | 0.9463<br>(0.7917<br>, 1.138) | 0.9496<br>(0.7298<br>, 1.241) | 0.823<br>(0.5323<br>, 1.261)  | 0.7628<br>(0.5176<br>, 1.136) | 0.6304<br>(0.4596<br>,<br>0.8501) | 0.4665<br>(0.3993<br>,<br>0.5453) | 0.6027<br>(0.3732<br>,<br>0.9782) | 0.6081<br>(0.3823<br>,<br>0.9538) | 0.7801<br>(0.6234<br>,<br>0.9682) | 0.558<br>(0.2813<br>, 1.094)  |
|---------------------------------|----------------------------------|------------------------------|-----------------------------------|-------------------------------|-----------------------------------|-------------------------------|-------------------------------|-------------------------------|-------------------------------|-----------------------------------|-----------------------------------|-----------------------------------|-----------------------------------|-----------------------------------|-------------------------------|
| 2.105<br>(1.158,<br>3.742)      | <b>AKT_plus_FUL</b>              | 2.141<br>(1.046,<br>4.366)   | 1.076<br>(0.5481<br>, 2.145)      | 0.8779<br>(0.5859,<br>1.31)   | 0.7739<br>(0.47,<br>1.276)        | 1.999<br>(1.086,<br>3.667)    | 2.006<br>(1.037,<br>3.771)    | 1.722<br>(1.181,<br>2.506)    | 1.611<br>(0.8076<br>, 3.187)  | 1.322<br>(0.7012<br>, 2.48)       | 0.9805<br>(0.5562<br>, 1.73)      | 1.269<br>(0.8298<br>, 1.959)      | 1.275<br>(0.8683<br>, 1.887)      | 1.643<br>(0.8618<br>, 3.055)      | 1.179<br>(0.6226<br>, 2.187)  |
| 0.981<br>(0.632<br>7,<br>1.507) | 0.4671<br>(0.229,<br>0.9557)     | <b>Anti_androgen_plus_AI</b> | 0.5006<br>(0.2883<br>,<br>0.8801) | 0.4097<br>(0.222,<br>0.7492)  | 0.3626<br>(0.2093<br>,<br>0.6072) | 0.9292<br>(0.5769<br>, 1.48)  | 0.9286<br>(0.5567<br>, 1.527) | 0.8027<br>(0.4374<br>, 1.486) | 0.7492<br>(0.4163<br>, 1.326) | 0.6139<br>(0.3619<br>, 1.044)     | 0.4576<br>(0.2879<br>,<br>0.7194) | 0.5947<br>(0.3165<br>, 1.133)     | 0.596<br>(0.3197<br>, 1.122)      | 0.7669<br>(0.4757<br>, 1.22)      | 0.5538<br>(0.2399<br>, 1.243) |

|                                 |                                |                             |                                     |                                              |                                |                              |                                 |                               |                                |                                |                                |                                |                                |                               |                               |
|---------------------------------|--------------------------------|-----------------------------|-------------------------------------|----------------------------------------------|--------------------------------|------------------------------|---------------------------------|-------------------------------|--------------------------------|--------------------------------|--------------------------------|--------------------------------|--------------------------------|-------------------------------|-------------------------------|
| 1.958<br>(1.346,<br>2.834)      | 0.9297<br>(0.4663<br>, 1.825)  | 1.998<br>(1.136,<br>3.468)  | <b>CDK4_<br/>or_6i_p<br/>lus_AI</b> | 0.8174<br>(0.4718,<br>1.41)                  | 0.7244<br>(0.4481<br>, 1.161)  | 1.852<br>(1.224,<br>2.813)   | 1.853<br>(1.184,<br>2.934)      | 1.604<br>(0.9108<br>, 2.835)  | 1.494<br>(0.8582<br>, 2.552)   | 1.228<br>(0.7536<br>, 1.994)   | 0.9116<br>(0.6093<br>, 1.354)  | 1.179<br>(0.6584<br>, 2.167)   | 1.188<br>(0.6628<br>, 2.132)   | 1.515<br>(0.9755<br>, 2.363)  | 1.091<br>(0.507,<br>2.38)     |
| 2.394<br>(1.583,<br>3.63)       | 1.139<br>(0.7636<br>, 1.707)   | 2.441<br>(1.335,<br>4.505)  | 1.223<br>(0.709,<br>2.119)          | <b>CDK4_o<br/>r_6i_plu<br/>s_FUL50<br/>0</b> | 0.886<br>(0.6608<br>, 1.176)   | 2.273<br>(1.457,<br>3.56)    | 2.283<br>(1.385,<br>3.723)      | 1.969<br>(1.696,<br>2.28)     | 1.827<br>(1.057,<br>3.171)     | 1.499<br>(0.9374<br>, 2.417)   | 1.116<br>(0.7568<br>, 1.658)   | 1.449<br>(1.143,<br>1.847)     | 1.454<br>(1.217,<br>1.748)     | 1.861<br>(1.17,<br>3.007)     | 1.33<br>(0.7786<br>, 2.317)   |
| 2.707<br>(1.992,<br>3.737)      | 1.292<br>(0.7837<br>, 2.128)   | 2.758<br>(1.647,<br>4.777)  | 1.38<br>(0.8612<br>, 2.232)         | 1.129<br>(0.8504,<br>1.513)                  | <b>Chemo<br/>therap<br/>y</b>  | 2.578<br>(1.789,<br>3.669)   | 2.57<br>(1.719,<br>3.854)       | 2.228<br>(1.611,<br>3.037)    | 2.058<br>(1.272,<br>3.39)      | 1.697<br>(1.158,<br>2.496)     | 1.264<br>(0.9635<br>, 1.668)   | 1.645<br>(1.125,<br>2.367)     | 1.642<br>(1.178,<br>2.284)     | 2.1<br>(1.439,<br>3.12)       | 1.507<br>(0.819,<br>2.788)    |
| 1.057<br>(0.878<br>9,<br>1.263) | 0.5002<br>(0.2727<br>, 0.9205) | 1.076<br>(0.6757,<br>1.733) | 0.54<br>(0.3555<br>, 0.817)         | 0.4399<br>(0.2809,<br>0.6863)                | 0.3878<br>(0.2725<br>, 0.559)  | <b>FUL25<br/>0</b>           | 1<br>(0.8262<br>, 1.211)        | 0.8641<br>(0.5393<br>, 1.388) | 0.8058<br>(0.5278<br>, 1.243)  | 0.6635<br>(0.4622<br>, 0.9489) | 0.4925<br>(0.3873<br>, 0.6274) | 0.6371<br>(0.3805<br>, 1.06)   | 0.6401<br>(0.3904<br>, 1.031)  | 0.8231<br>(0.6133<br>, 1.097) | 0.5879<br>(0.2938<br>, 1.182) |
| 1.053<br>(0.805<br>6,<br>1.37)  | 0.4985<br>(0.2652<br>, 0.9642) | 1.077<br>(0.655,<br>1.796)  | 0.5396<br>(0.3409<br>, 0.8444)      | 0.4381<br>(0.2686,<br>0.7218)                | 0.389<br>(0.2595<br>, 0.5817)  | 0.9997<br>(0.8259<br>, 1.21) | <b>FUL25<br/>0_plus<br/>_AI</b> | 0.8632<br>(0.5191<br>, 1.432) | 0.8065<br>(0.4993<br>, 1.28)   | 0.6661<br>(0.4409<br>, 0.9857) | 0.4917<br>(0.3624<br>, 0.6622) | 0.6337<br>(0.3676<br>, 1.104)  | 0.6378<br>(0.3777<br>, 1.074)  | 0.8227<br>(0.5808<br>, 1.161) | 0.5839<br>(0.2821<br>, 1.242) |
| 1.215<br>(0.793,<br>1.879)      | 0.5807<br>(0.3991<br>, 0.8471) | 1.246<br>(0.6732,<br>2.286) | 0.6235<br>(0.3527<br>, 1.098)       | 0.5078<br>(0.4387,<br>0.5895)                | 0.4489<br>(0.3293<br>, 0.6207) | 1.157<br>(0.7206<br>, 1.854) | 1.158<br>(0.6982<br>, 1.926)    | <b>FUL50<br/>0</b>            | 0.9274<br>(0.5265<br>, 1.64)   | 0.7667<br>(0.4607<br>, 1.261)  | 0.5669<br>(0.3742<br>, 0.8561) | 0.7351<br>(0.6089<br>, 0.8863) | 0.7401<br>(0.668,<br>0.8185)   | 0.9462<br>(0.5863<br>, 1.553) | 0.6753<br>(0.4019<br>, 1.146) |
| 1.311<br>(0.880<br>2,<br>1.932) | 0.6206<br>(0.3138<br>, 1.238)  | 1.335<br>(0.7541,<br>2.402) | 0.6693<br>(0.3919<br>, 1.165)       | 0.5472<br>(0.3154,<br>0.9457)                | 0.486<br>(0.295,<br>0.7864)    | 1.241<br>(0.8045<br>, 1.895) | 1.24<br>(0.7812<br>, 2.003)     | 1.078<br>(0.6099<br>, 1.899)  | <b>HDAC<br/>_plus_<br/>_AI</b> | 0.8261<br>(0.501,<br>1.35)     | 0.6121<br>(0.3994<br>, 0.9222) | 0.7925<br>(0.4338<br>, 1.457)  | 0.7961<br>(0.4443<br>, 1.406)  | 1.021<br>(0.6489<br>, 1.58)   | 0.7339<br>(0.3345<br>, 1.596) |
| 0.9897<br>(0.794<br>5,<br>1.24) | 0.4679<br>(0.2536<br>, 0.8787) | 1.007<br>(0.6295,<br>1.629) | 0.5054<br>(0.3313<br>, 0.7814)      | 0.413<br>(0.2603,<br>0.6556)                 | 0.3653<br>(0.2502<br>, 0.5321) | 0.936<br>(0.7105<br>, 1.243) | 0.9387<br>(0.6636<br>, 1.325)   | 0.8093<br>(0.4981<br>, 1.305) | 0.7598<br>(0.478,<br>1.186)    | 0.6224<br>(0.4291<br>, 0.9031) | 0.4625<br>(0.3543<br>, 0.6013) | 0.594<br>(0.3494<br>, 1.01)    | 0.6012<br>(0.3634<br>, 0.9882) | 0.769<br>(0.5668<br>, 1.066)  | 0.5494<br>(0.2704<br>, 1.132) |
| 1.586<br>(1.176,<br>2.176)      | 0.7562<br>(0.4032<br>, 1.426)  | 1.629<br>(0.9576,<br>2.763) | 0.8146<br>(0.5015<br>, 1.327)       | 0.6673<br>(0.4138,<br>1.067)                 | 0.5892<br>(0.4006<br>, 0.8638) | 1.507<br>(1.054,<br>2.164)   | 1.501<br>(1.014,<br>2.268)      | 1.304<br>(0.7931<br>, 2.171)  | 1.211<br>(0.7406<br>, 1.996)   | <b>mTOR</b>                    | 0.7426<br>(0.5689<br>, 0.9624) | 0.96<br>(0.5722<br>, 1.629)    | 0.9691<br>(0.5844<br>, 1.611)  | 1.237<br>(0.847,<br>1.824)    | 0.8814<br>(0.4316<br>, 1.814) |
| 2.144<br>(1.834,<br>2.504)      | 1.02<br>(0.5779<br>, 1.798)    | 2.185<br>(1.39,<br>3.473)   | 1.097<br>(0.7386<br>, 1.641)        | 0.8959<br>(0.6033,<br>1.321)                 | 0.791<br>(0.5996<br>, 1.038)   | 2.03<br>(1.594,<br>2.582)    | 2.034<br>(1.51,<br>2.759)       | 1.764<br>(1.168,<br>2.672)    | 1.634<br>(1.084,<br>2.504)     | 1.347<br>(1.039,<br>1.758)     | <b>mTOR<br/>_plus_<br/>_AI</b> | 1.3<br>(0.818,<br>2.063)       | 1.304<br>(0.8539<br>, 2.005)   | 1.673<br>(1.281,<br>2.195)    | 1.193<br>(0.6117<br>, 2.328)  |

|                                 |                               |                             |                               |                               |                                |                              |                              |                              |                               |                               |                                |                                        |                                    |                              |                                  |
|---------------------------------|-------------------------------|-----------------------------|-------------------------------|-------------------------------|--------------------------------|------------------------------|------------------------------|------------------------------|-------------------------------|-------------------------------|--------------------------------|----------------------------------------|------------------------------------|------------------------------|----------------------------------|
| 1.659<br>(1.022,<br>2.68)       | 0.788<br>(0.5105<br>, 1.205)  | 1.681<br>(0.8827,<br>3.159) | 0.848<br>(0.4615<br>, 1.519)  | 0.6902<br>(0.5415,<br>0.8751) | 0.6079<br>(0.4225<br>, 0.889)  | 1.57<br>(0.943,<br>2.628)    | 1.578<br>(0.906,<br>2.72)    | 1.36<br>(1.128,<br>1.642)    | 1.262<br>(0.6862<br>, 2.305)  | 1.042<br>(0.6137<br>, 1.748)  | 0.7691<br>(0.4847<br>, 1.222)  | <b>mTOR<br/>_plus_<br/>FUL50<br/>0</b> | 1.004<br>(0.8112<br>, 1.251)       | 1.284<br>(0.7586<br>, 2.192) | 0.9183<br>(0.5351<br>, 1.599)    |
| 1.644<br>(1.048,<br>2.616)      | 0.7842<br>(0.5301<br>, 1.152) | 1.678<br>(0.8914,<br>3.128) | 0.8419<br>(0.4691<br>, 1.509) | 0.6878<br>(0.5722,<br>0.8215) | 0.6089<br>(0.4378<br>, 0.8489) | 1.562<br>(0.9697<br>, 2.562) | 1.568<br>(0.9309<br>, 2.648) | 1.351<br>(1.222,<br>1.497)   | 1.256<br>(0.7112<br>, 2.251)  | 1.032<br>(0.6208<br>, 1.711)  | 0.7666<br>(0.4988<br>, 1.171)  | 0.9961<br>(0.7996<br>, 1.233)          | <b>PI3Ki_<br/>plus_F<br/>UL500</b> | 1.282<br>(0.7792<br>, 2.117) | 0.9136<br>(0.5422<br>, 1.534)    |
| 1.282<br>(1.033,<br>1.604)      | 0.6085<br>(0.3274<br>, 1.16)  | 1.304<br>(0.8195,<br>2.102) | 0.6601<br>(0.4232<br>, 1.025) | 0.5374<br>(0.3325,<br>0.8547) | 0.4761<br>(0.3205<br>, 0.6949) | 1.215<br>(0.9115<br>, 1.63)  | 1.216<br>(0.861,<br>1.722)   | 1.057<br>(0.644,<br>1.706)   | 0.9798<br>(0.6327<br>, 1.541) | 0.8082<br>(0.5482<br>, 1.181) | 0.5979<br>(0.4557<br>, 0.7806) | 0.7791<br>(0.4563<br>, 1.318)          | 0.7803<br>(0.4724<br>, 1.283)      | <b>TKI_pl<br/>us_AI</b>      | 0.7165<br>(0.348,<br>1.473)      |
| 1.792<br>(0.914<br>5,<br>3.555) | 0.848<br>(0.4573<br>, 1.606)  | 1.806<br>(0.8047,<br>4.168) | 0.9165<br>(0.4202<br>, 1.972) | 0.7516<br>(0.4316,<br>1.284)  | 0.6635<br>(0.3586<br>, 1.221)  | 1.701<br>(0.8461<br>, 3.404) | 1.713<br>(0.8051<br>, 3.545) | 1.481<br>(0.8729<br>, 2.488) | 1.363<br>(0.6265<br>, 2.99)   | 1.135<br>(0.5513<br>, 2.317)  | 0.8383<br>(0.4295<br>, 1.635)  | 1.089<br>(0.6252<br>, 1.869)           | 1.095<br>(0.6517<br>, 1.844)       | 1.396<br>(0.6789<br>, 2.874) | <b>TKI_p<br/>lus_FU<br/>L500</b> |

**eTable S32. SUCRA values of PFS for post-menopausal women in ETR patients (network 2)**

| Treatment     | Sucra value FE |
|---------------|----------------|
| mTOR_plus_TAM | 0.9912         |
| TAM           | 0.4101         |
| TKI_plus_TAM  | 0.0986         |

**eTable S33. Effect estimates of PFS for post-menopausal women in ETR patients: hazard ratio (95% credibility interval, CrI) (network 2)**

|                         |                         |                       |
|-------------------------|-------------------------|-----------------------|
| <b>mTOR_plus_TAM</b>    | 1.848 (1.237, 2.738)    | 2.66 (0.1928, 35.56)  |
| 0.5411 (0.3652, 0.8086) | <b>TAM</b>              | 1.479 (0.1013, 18.21) |
| 0.3759 (0.02812, 5.188) | 0.6761 (0.05491, 9.876) | <b>TKI_plus_TAM</b>   |

**eTable S34. SUCRA values of PFS for pre-menopausal women in ETR patients (network 1)**

| Treatment             | Sucra value RE |
|-----------------------|----------------|
| CDK4_OR_6_plus_Ful500 | 0.955          |

|         |       |
|---------|-------|
| Ful_500 | 0.045 |
|---------|-------|

**eTable S35. Effect estimates of PFS for pre-menopausal women in ETR patients: hazard ratio (95% credibility interval, CrI) (network 1)**

|                               |                       |
|-------------------------------|-----------------------|
| <b>CDK4_or_6i_plus_FUL500</b> | 1.867 (0.8317, 4.299) |
| 0.5355 (0.2326, 1.202)        | <b>FUL500</b>         |

**eTable S36. SUCRA values of PFS for pre-menopausal women in ETR patients (network 2)**

| Treatment    | Sucra value RE |
|--------------|----------------|
| mTOR_plus_AI | 0.9427         |
| AI           | 0.0572         |

**eTable S37. Effect estimates of PFS for pre-menopausal women in ETR patients: hazard ratio (95% credibility interval, CrI) (network 2)**

|                       |                        |
|-----------------------|------------------------|
| <b>AI</b>             | 0.5281 (0.2249, 1.257) |
| 1.894 (0.7958, 4.446) | <b>mTOR_plus_AI</b>    |

**eFigure S1. Risk of bias across studies (main analysis in ETS and ETR patients)**

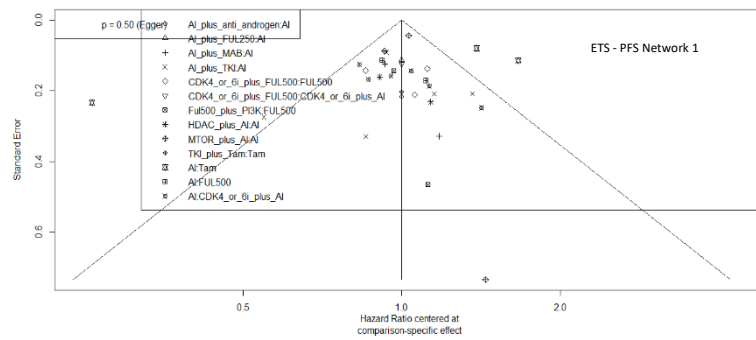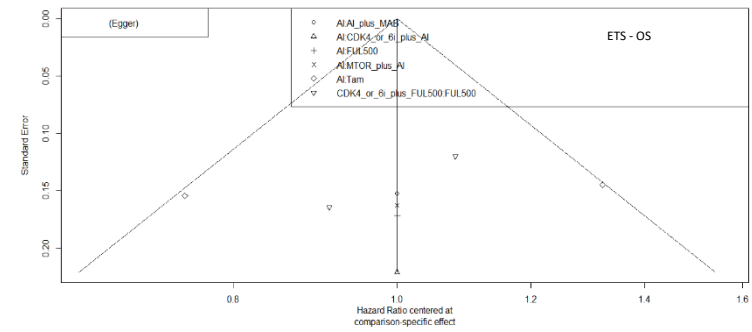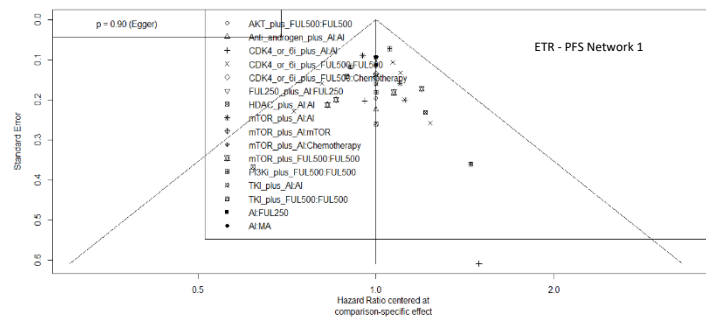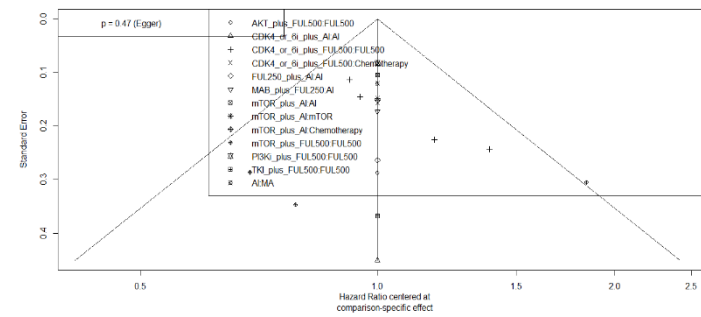



eFigure S2. Risk of bias across studies (subgroup analysis for targeted regimens in ETS patients)

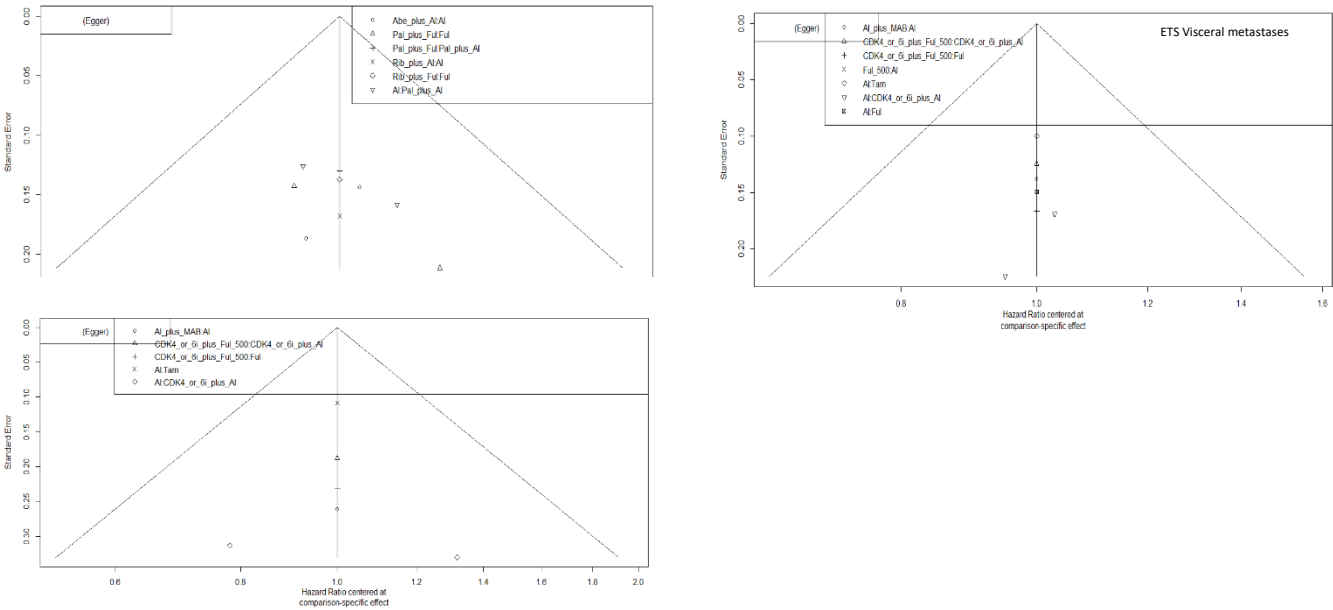

eFigure S3. Risk of bias across studies (subgroup analysis for targeted regimens and menopausal women in ETR patients)

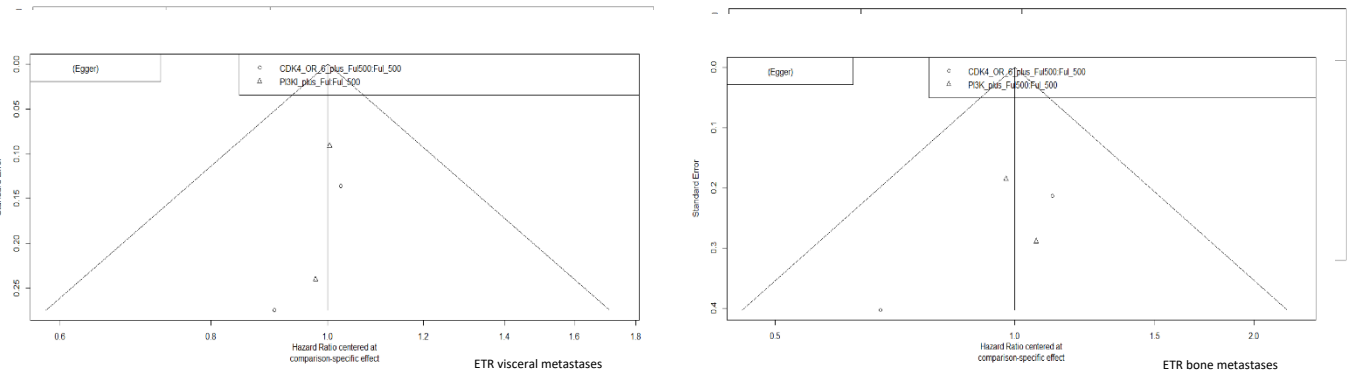

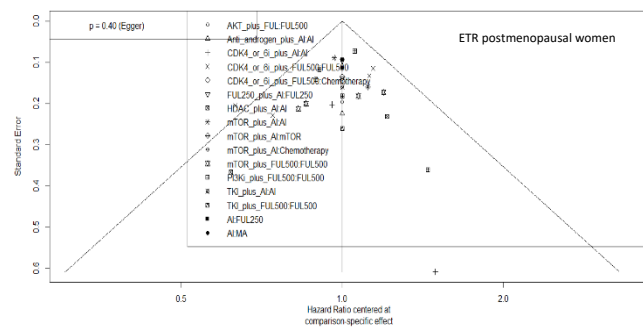

**eFigure S4. Quality assessment data for individual studies**

| Study name          | D1 | D2 | D3 | D4 | D5 | Overall |
|---------------------|----|----|----|----|----|---------|
| Ibrahim 2011        | +  | +  | +  | +  | !  | !       |
| Goez 2017           | +  | +  | +  | +  | +  | +       |
| Zhang 2020          | +  | +  | +  | +  | +  | +       |
| Antonio 2013        | +  | +  | !  | +  | !  | !       |
| Dikder 2016         | +  | +  | +  | +  | !  | !       |
| Goss 2007           | +  | +  | +  | +  | +  | +       |
| Hvams               | !  | !  | +  | !  | +  | +       |
| Cristofanilli 2010  | +  | +  | +  | +  | +  | +       |
| Johnston 2009       | +  | +  | +  | +  | +  | +       |
| Johnston 2016       | +  | +  | +  | +  | +  | +       |
| Krop 2020           | +  | +  | +  | +  | +  | +       |
| Altan 2020          | +  | +  | +  | !  | +  | !       |
| Lombart-Cussac 2021 | !  | !  | +  | +  | +  | +       |
| Narvidien           | +  | !  | +  | +  | +  | +       |
| Parkeens 2008       | +  | !  | +  | !  | +  | !       |
| Nilla Santos 2003   | +  | !  | +  | +  | +  | !       |
| Paul 2019           | !  | !  | +  | !  | +  | !       |
| Mehra 2012          | +  | +  | +  | +  | +  | +       |
| Finn 2015           | +  | +  | +  | +  | +  | +       |
| Finn 2016           | +  | !  | +  | +  | +  | +       |
| Cristofanilli 2016  | +  | +  | +  | +  | +  | +       |
| Hortobagvi 2028     | +  | +  | +  | +  | +  | +       |
| Slamon 2021         | +  | +  | +  | +  | +  | +       |
| Johnston 2013       | +  | +  | +  | +  | +  | +       |
| Andre 2019          | +  | +  | +  | +  | +  | +       |
| Leo 2018            | +  | +  | +  | +  | +  | +       |
| Finn 2021           | +  | +  | +  | +  | +  | +       |
| Osborne 2011        | +  | +  | +  | +  | +  | +       |
| Jain 2019           | +  | +  | +  | +  | +  | +       |
| Yardley 2011        | +  | +  | +  | +  | +  | +       |
| Xu 2021             | +  | +  | +  | +  | +  | +       |
| Treilleux 2015      | +  | +  | +  | +  | +  | +       |
| Basela 2017         | +  | +  | +  | +  | +  | +       |
| Piccart 2014        | +  | +  | +  | +  | +  | +       |
| Jones 2020          | +  | +  | +  | +  | +  | +       |
| Krop 2016           | +  | +  | +  | +  | +  | +       |
| Jerusalem 2018      | !  | !  | +  | +  | +  | +       |
| Schmid 2019         | +  | +  | +  | +  | +  | +       |
| Mussolino 2017      | +  | +  | +  | +  | +  | +       |
| Martin 2021         | +  | +  | +  | +  | +  | +       |
| Kornblum 2018       | +  | +  | +  | +  | +  | +       |
| Xu 2021             | +  | +  | +  | +  | +  | +       |
| Buzdar 2002         | +  | +  | +  | +  | +  | +       |
| Sledge 2017         | +  | +  | +  | +  | +  | +       |
| Shao 2021           | +  | +  | +  | +  | +  | +       |
| Robertson 2012      | !  | +  | +  | +  | !  | !       |
| Robertson 2016      | +  | +  | +  | +  | !  | !       |

  

|   |               |    |                                 |
|---|---------------|----|---------------------------------|
| + | Low risk      | D1 | Randomization process           |
| ! | Some concerns | D2 | Deviations from the intended i  |
| + | High risk     | D3 | Missing outcome data            |
|   |               | D4 | Measurement of the outcome      |
|   |               | D5 | Selection of the reported resul |

eFigure S5. Chemical structure of fulvestrant

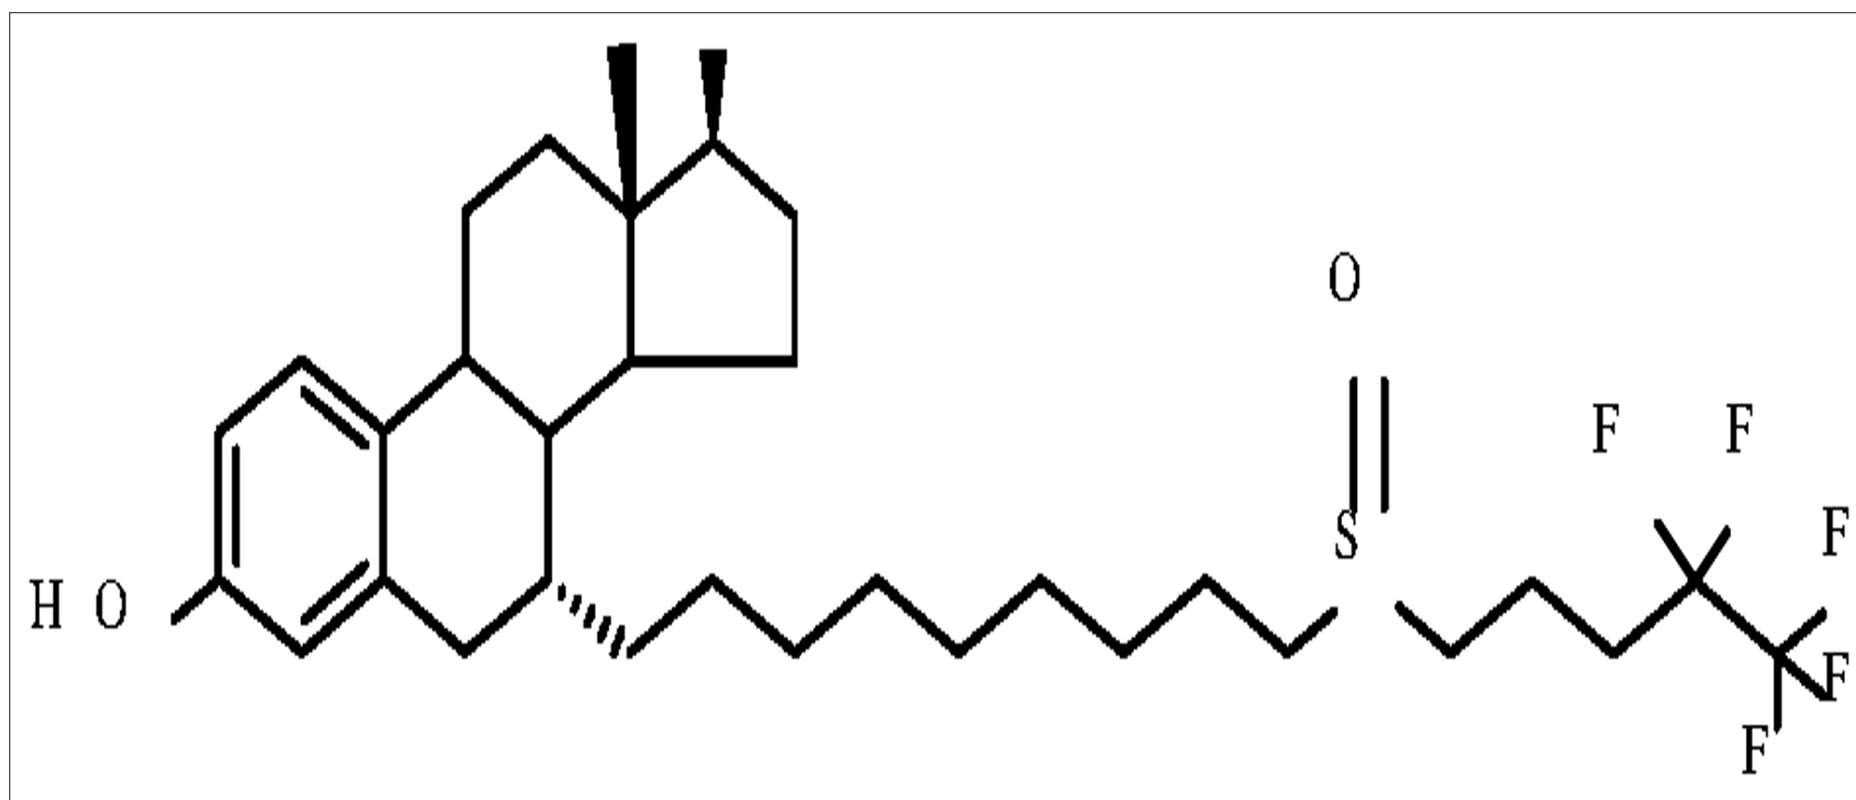

Supplement: s1 [file s1]
